# Supplementary material for: Self-reported sleep duration and napping, cardiac risk factors and markers of subclinical vascular disease: cross-sectional study in older men
Source: PubMed Central journal article supplement (PMC5726087; doi:10.1136/bmjopen-2017-016396), 2017-07-02
Supplement: bmjopen-2017-016396.draft_revisions.pdf [file bmjopen-2017-016396.draft_revisions.pdf]

# BMJ Open

## Self-reported sleep duration and napping, cardiac risk factors and markers of subclinical vascular disease: cross-sectional study in older men

|                                 |                                                                                                                                                                                                                                                                                                                                                                                                                                                                                                                             |
|---------------------------------|-----------------------------------------------------------------------------------------------------------------------------------------------------------------------------------------------------------------------------------------------------------------------------------------------------------------------------------------------------------------------------------------------------------------------------------------------------------------------------------------------------------------------------|
| Journal:                        | <i>BMJ Open</i>                                                                                                                                                                                                                                                                                                                                                                                                                                                                                                             |
| Manuscript ID                   | bmjopen-2017-016396                                                                                                                                                                                                                                                                                                                                                                                                                                                                                                         |
| Article Type:                   | Research                                                                                                                                                                                                                                                                                                                                                                                                                                                                                                                    |
| Date Submitted by the Author:   | 14-Feb-2017                                                                                                                                                                                                                                                                                                                                                                                                                                                                                                                 |
| Complete List of Authors:       | Zonoozi, Shahrzad; UCL, Department of Primary Care & Population Health<br>Ramsay, Sheena; Newcastle University, Institute of Health & Society<br>Papacosta, Olia; University College London,<br>Lennon, Lucy; UCL, Department of Primary Care and Population Health<br>Ellins, Elizabeth; Swansea University, Institute of Life Sciences<br>Halcox, Julian; Swansea University, Department of Cardiology<br>Whincup, Peter; St George's University of London,<br>Wannamethee, Goya; UCL, Primary Care and Population Health |
| <b>Primary Subject Heading</b>: | Epidemiology                                                                                                                                                                                                                                                                                                                                                                                                                                                                                                                |
| Secondary Subject Heading:      | Cardiovascular medicine                                                                                                                                                                                                                                                                                                                                                                                                                                                                                                     |
| Keywords:                       | Sleep patterns, Cardiac function, Subclinical atherosclerosis                                                                                                                                                                                                                                                                                                                                                                                                                                                               |
|                                 |                                                                                                                                                                                                                                                                                                                                                                                                                                                                                                                             |

SCHOLARONE™  
Manuscripts

Only

1  
2  
3 **Self-reported sleep duration and napping, cardiac risk factors and markers of**  
4 **subclinical vascular disease: cross-sectional study in older men**  
5  
6

7  
8 Shahrzad Zonoozi<sup>1</sup>; Sheena Ramsay<sup>1</sup>; Olia Papacosta<sup>1</sup>; Lucy Lennon<sup>1</sup>; Elizabeth A Ellins<sup>2</sup>;  
9  
10 Julian P J Halcox<sup>2</sup>; Peter H Whincup<sup>3</sup>; S Goya Wannamethee<sup>1</sup>  
11

12  
13 <sup>1</sup> UCL Department of Primary Care & Population Health, UCL Medical School, Rowland Hill  
14 Street, London, NW3 2PF, UK  
15

16  
17  
18 <sup>2</sup> Institute of Life Sciences, Swansea University, Singleton Park, Swansea, SA2 8PP, UK  
19

20  
21 <sup>3</sup> Population Health Research Institute, St George's University of London, Cranmer Terrace,  
22 London, SW17 0RE, UK  
23  
24  
25  
26  
27

28 **Corresponding author:**  
29

30  
31 Shahrzad Zonoozi, UCL Department of Primary Care & Population Health, UCL Medical  
32 School, Rowland Hill Street, London, NW3 2PF, UK. Email: shahrzadz@gmail.com  
33  
34

35  
36 Word count: 3551; 4 tables  
37  
38  
39  
40  
41

42 Keywords: sleep patterns, cardiac function, subclinical atherosclerosis  
43  
44  
45  
46  
47  
48  
49  
50  
51  
52  
53  
54  
55  
56  
57  
58  
59  
60

## Abstract

**Study Objectives:** Daytime sleep has been associated with increased risk of cardiovascular disease and heart failure (HF) but the mechanisms remain unclear. We have investigated the association between daytime and night-time sleep patterns and cardiovascular risk markers in older adults including cardiac markers and subclinical markers of atherosclerosis [arterial stiffness and carotid intima-media thickness (CIMT)].

**Methods:** Cross sectional study of 1722 surviving men aged 71-92 examined in 2010-2012 across 24 British towns, from a prospective study initiated in 1978-1980. Participants completed a questionnaire and were invited for a physical examination. Men with a history of heart attack or HF (n = 251) were excluded from the analysis.

**Results:** Self-reported daytime sleep duration was associated with higher fasting glucose and insulin levels (p = 0.02 and 0.01 respectively) even after adjustment for age, BMI, physical activity and social class. Compared to those with no daytime sleep, men with daytime sleep >1 hour, defined as excessive daytime sleepiness (EDS), had a higher risk of raised N-terminal pro brain natriuretic peptide (NT-pro BNP) of  $\geq 400$ pg/ml, the diagnostic threshold for HF [OR (95% CI) = 1.88 (1.15, 3.1)], higher mean troponin (cTnT), reduced lung function (forced expiratory volume in 1s) and elevated von Willebrand factor (vWF), a marker of endothelial dysfunction. However, EDS was unrelated to CIMT and arterial stiffness. By contrast night-time sleep was only associated with HbA1c (short or long sleep) and arterial stiffness (short sleep).

**Conclusions:** Daytime sleep duration of >1 hour may be an early indicator of HF.

Word count: 248

## Article Summary

### Strength and limitations of this study

- To the best of our knowledge, this is the first study to look at the association between excessive daytime sleepiness (EDS), cardiac markers and vascular parameters.
- Owing to a lack of data, we do not know if the associations seen are true for women, middle aged populations and ethnic minorities.
- As we do not have polysomnography data, we were unable to fully exclude obstructive sleep apnoea as a contributing factor to our findings.
- Our results are based on a cross-sectional analysis and therefore causality cannot be established.

## Introduction

Sleep disturbance is a common complaint, especially amongst older adults. (1) It is increasingly recognised that there is a U shaped association between sleep duration and risk of cardiovascular disease (CVD) and metabolic disturbances – i.e. both short and long sleep durations are associated with an increased risk. (2-4) More recently, studies have shown excessive daytime sleepiness (EDS), one of the more common sleep disturbances reported in the older population, to be associated with increased risks of CVD (5, 6), heart failure (HF) (6, 7) and all-cause mortality. (8-10)

The mechanism of the association between EDS and CVD risk remains unclear. Whilst some studies have looked at the association between EDS and metabolic risk markers (11, 12), few have examined mechanisms by which EDS may influence CVD and in particular incident HF. (6) In particular, the association between EDS and markers of arterial disease and surrogate markers of cardiac function, including NT-pro brain natriuretic peptide (BNP), a marker of ventricular stress, and cardiac troponin T (cTnT), a marker of myocardial injury, have been less studied. Sub-clinical arterial disease markers are increasingly being used as early predictors for atherosclerosis and CVD. A number of non-invasive assessments have been developed, including measures of atherosclerosis such as carotid intima-media thickness (CIMT) and indirect measures of arterial stiffness including carotid distensibility and pulse wave velocity (PWV). Although a number of studies have examined the association between night-time sleep duration and arterial stiffness, (13-17) studies on the association between EDS and vascular risk markers are limited. (5) We have therefore examined the association between daytime sleep as well as night-time sleep with vascular risk factors including metabolic risk factors, inflammatory and endothelial markers, cardiac markers and measures of sub-clinical arterial disease (including arterial stiffness and CIMT).

## Methods

The British Regional Heart Study is a prospective study which recruited a socioeconomically and geographically representative cohort of 7735 men from 24 British towns between 1978 and 1980. The present investigation is based on a reassessment in 2010-2012, when all surviving men (n = 3137), aged between 71–92 years, were sent a postal questionnaire and invited for a 30<sup>th</sup> year re-examination. 2137 (68%) men completed the postal questionnaire and 1722 (55%) men attended the re-examination. (18) Blood samples were collected after fasting for a minimum of six hours and were stored at -70°C. Ethical approval for data collection was obtained from the relevant research ethics committee. The presence of co-morbidity was based on the men self-reporting a doctor made diagnosis and those with a history of heart attack or HF were excluded from the analysis (n = 251). Of the men with no history of heart attack or HF, 1471 men had physical, blood and ultrasound measurements carried out. This present study is a cross-sectional analysis of the data from the 2010-2012 questionnaires and re-examination.

*CVD risk factors:* Physical examination included blood pressure (BP), lung function as well as height and weight, from which body mass index (BMI) was calculated. (19) Height standardised forced expiratory volume in 1 second (FEV1) was measured using the Vitalograph Compact II. Details of measurement and classification for smoking status and physical activity in this cohort have been previously described. (20) The use of antihypertensive medication was based on self-reported medication history and participants were also asked to report symptoms of breathlessness. Measurements of metabolic, inflammatory and endothelial markers were taken as described previously. (19, 21, 22) NT-pro BNP and cTnT were measured using the Elecsys 2010 electrochemiluminescence method (Roche Diagnostics, Burgess Hill, UK). NT-pro BNP  $\geq 400$ pg/ml was defined as high, as per current guidelines issued by the National Institute of Clinical Excellence (NICE) for the diagnosis of HF. (23) Prevalent diabetes included men with doctor-diagnosed diabetes and

1  
2  
3 men with fasting blood glucose  $\geq 7$  mmol/L. 1402 men had at least one blood measurement  
4  
5 (69 missing).  
6

7  
8 *Sleep parameters:* Reported duration of night sleep was based on response to: "On average,  
9  
10 how many hours of sleep do you have each night?" Duration of day sleep was based on  
11  
12 response to "On average, how much sleep (if any) do you have during the daytime?" If a  
13  
14 response was entered for the night sleep question but no response was indicated for the day  
15  
16 sleep question, the answer was set to 0. 1436 men completed the questions on night-time  
17  
18 and daytime sleep duration (35 missing). Night-time sleep was categorised into three  
19  
20 groups:  $< 6$ , 6-8.9 and  $\geq 9$  hours. Daytime sleep was categorised into four groups: 0 hours,  $< 1$   
21  
22 hour, 1 hour and  $> 1$  hour. Those sleeping  $> 1$  hour during the daytime were defined as  
23  
24 having EDS.  
25

26  
27 *Non-invasive markers of arterial disease:* Measurements were measured by two vascular  
28  
29 technicians in series. Left and right carotid arteries were images using a Z.One Ultra  
30  
31 ultrasound system (Zonare Medical Systems, Mountain View, CA) with a 5-10-mHz linear  
32  
33 probe. A cross sectional sweep from the base of the common carotid artery to the jaw bone  
34  
35 and longitudinal images of the common carotid artery approximately 1cm proximal to the  
36  
37 carotid bifurcation were recorded. Peak systolic and end-diastolic common carotid artery  
38  
39 diameter and CIMT, the distance between the leading edge of the intima and the media-  
40  
41 adventitia interface, were measured using Carotid Analyser software (Medical Imaging  
42  
43 Applications, Iowa City, IA). From the longitudinal images, a region of interest (5-10 mm)  
44  
45 was selected in a plaque free area, at least 1cm from the bifurcation.  
46

47  
48 CIMT was measured from three end-diastolic images on each side and a mean of these  
49  
50 measures was calculated. Maximum and minimum carotid artery diameter was assessed  
51  
52 from three consecutive waveforms and mean distension was calculated as: maximum  
53  
54 diameter – minimum diameter. The distensibility coefficient was then calculated as described  
55  
56 by Dijk *et al.*: distensibility coefficient =  $[(2 \times \text{mean distension}/\text{baseline diameter})/\text{mean pulse}$   
57  
58  $\text{pressure (kPa)}] \times 1000$ . (24) Carotid to femoral PWV was assessed using a Vicorder  
59  
60

1  
2  
3 (Skidmore Medical, Bristol UK), with participants in a semi-supine position with their torso at  
4 approximately 30°. A 2x9cm cuff was positioned around the neck with the bladder over the  
5 right carotid pulse, and a Hokanson SC10 cuff around the middle of the right thigh. Path  
6 length was measured from the sternal notch to the centre of the thigh cuff. The cuffs were  
7 simultaneously inflated and traces with a minimum of 3 good quality waveforms recorded.  
8  
9 Two PWV measurements, within  $\leq 0.5$ m/s of each other, were accepted and averaged. 1464  
10 men had at least one non-invasive vascular measurement carried out (7 missing).  
11  
12

13  
14  
15  
16  
17  
18 *Statistical analysis:* Distributions of HbA1c, glucose, insulin, CRP, IL-6, NT-pro BNP and  
19 cTnT were highly skewed and log transformation was used. Comparisons of baseline  
20 characteristics between the sleep groups were carried out using the chi squared test for  
21 categorical variables and analysis of variance for continuous variables. Logistic regression  
22 models were used to assess the differences in outcomes between categorical groups. In  
23 multivariate analyses, age, BMI, physical activity and social class were fitted as continuous  
24 variables whilst prevalent diabetes and use of antihypertensive medications was defined as  
25 categorical variables. The base groups for the statistical analysis were the group sleeping 6-  
26 8.9 hours in the night-time sleep group. A threshold effect was seen in those sleeping >1  
27 hour in the daytime and therefore we compared those sleeping >1 hour with those sleeping  
28  $\leq 1$ . We also carried out statistical analysis of the trend in the daytime sleep group. All  
29 analyses were performed using SAS version 9.3 (SAS, Cary, North Carolina).  
30  
31  
32  
33  
34  
35  
36  
37  
38  
39  
40  
41  
42  
43  
44

## 45 Results

46  
47 The average duration of night-time sleep in the men who responded was 6.8 hours ( $\pm 1.4$   
48 hours). 15% of the men reported night-time sleep duration of less than 6 hours, while 7%  
49 reported sleeping  $\geq 9$  hours during the night. 47% of men reported no daytime sleep whilst  
50 9% reported EDS. Night-time sleep duration was significantly associated with EDS ( $p =$   
51 0.004), with a smaller proportion of those sleeping  $\geq 9$  hours reporting EDS. Daytime sleep  
52 duration was significantly associated with night-time sleep of less than 6 hours ( $p = 0.02$ ).  
53  
54  
55  
56  
57  
58  
59  
60



### *Baseline characteristics*

Table 1 describes the baseline characteristics of the study population according to night-time and daytime sleep patterns. A U-shaped relationship was seen between night-time sleep and CVD risk factors. Both short and long night-time sleep were associated with increased age, increased prevalence of physical inactivity, manual workers and breathlessness compared to those with 6-8.9 hours sleep. Daytime sleep is strongly associated with older age and with many adverse characteristics including physical inactivity, obesity, prevalent diabetes, breathlessness, use of anti-hypertensive medication, depression and chronic kidney disease (CKD). The prevalence of these adverse factors tended to increase with increasing duration of daytime sleep.

### *Night-time sleep and cardiovascular risk markers*

There was a U-shaped association between night-time sleep and metabolic risk factors including HbA1c and glucose (Table 2). In age-adjusted analysis, night-time sleep was significantly associated with IL-6, a marker of inflammation, but this association was attenuated following adjustment for BMI, social class and physical activity ( $p = 0.05$ ). No significant association was seen between night-time sleep and von Willebrand factor (vWF), a marker of endothelial function, FEV1 (lung function) or cardiac markers (NT-proBNP and cTnT).

### *Daytime sleep and cardiovascular risk markers*

In age-adjusted analysis, metabolic risk factors including HDL-C, triglycerides, HbA1c and insulin tended to increase with increasing hours of daytime sleep (Table 3). No association was seen with BP. The increasing trend was attenuated after adjustment for age, BMI, social class and physical activity. However compared to those who slept  $\leq 1$  hour, those with EDS

1  
2  
3 (>1 hour) showed significantly higher mean levels of HbA1c, glucose and insulin (Table 3).  
4  
5 Mean levels of glucose and insulin remained significantly higher in those with EDS ( $p = 0.02$   
6  
7 and 0.01 respectively) even after further adjustment for prevalent diabetes.  
8

9  
10 CRP increased with increasing daytime sleep duration, even after full adjustment ( $p$  trend =  
11  
12 0.04). Lung function decreased with increasing daytime sleep duration with levels markedly  
13  
14 reduced in those with EDS compared to those reporting  $\leq 1$  hour daytime sleep ( $p < 0.0001$ ).  
15  
16 Only EDS was associated with significantly higher mean vWF levels ( $p = 0.03$ ). When we  
17  
18 examined the odds of having high vWF (top quintile) and low FEV1 (lowest quintile), those  
19  
20 with EDS were 1.8 times more likely to have a high vWF [OR (95% CI) = 1.82 (1.17, 2.83)]  
21  
22 and 2.4 times more likely to have a low FEV1 [OR (95% CI) = 2.4 (1.53, 3.74)] compared to  
23  
24 those who reported no daytime sleep.  
25

26  
27 Mean levels of NT-pro BNP and cTnT (cardiac markers) were significantly higher only in  
28  
29 those with EDS following full adjustment ( $p = 0.02$  and 0.03 respectively). This association  
30  
31 remained significant even after adjustment for CKD. Men with EDS were more likely to have  
32  
33 high (top quintile) mean NT-pro BNP [OR (95% CI) = 1.69 (1.06, 2.7)] and cTnT [OR (95%  
34  
35 CI) = 1.75 (1.09, 2.8)] compared to those who reported no daytime sleep. However, this was  
36  
37 attenuated following adjustment for prevalent diabetes, use of antihypertensive medication  
38  
39 and depression [OR (95% CI) = 1.59 (0.99, 2.55)] and [OR (95% CI) = 1.62 (1.00, 2.62)]  
40  
41 respectively, although it remained significant for cTnT. We further looked at men with a NT-  
42  
43 pro BNP of  $\geq 400$ pg/ml, the diagnostic threshold for HF. Men who reported EDS had a higher  
44  
45 odds of having an NT-pro BNP of  $\geq 400$ pg/ml [OR (95% CI) = 1.88 (1.15, 3.1)]. This  
46  
47 association remained following adjustment for prevalent diabetes, use of antihypertensive  
48  
49 medication and depression [OR (95% CI) = 1.73 (1.04, 2.86)].  
50

51  
52  
53  
54 *Sleep patterns and non-invasive markers of arterial disease*  
55  
56  
57  
58  
59  
60

1  
2  
3 Table 4 shows the associations between sleeping patterns and non-invasive vascular  
4 measurements. There was a significant association between those sleeping less than 6  
5 hours and mean PWV and distensibility when compared to those sleeping 6-8.9 hours in the  
6 fully adjusted model ( $p = 0.04$  and  $0.03$  respectively). Men who slept less than 6 hours  
7 during the night-time were 1.6 times more likely to have a low (lowest quintile) mean  
8 distensibility compared to those who slept 6-8.9 hours in the fully adjusted model [OR (95%  
9 CI) = 1.56 (1.09, 2.23)]. There was no significant association between daytime sleep and  
10 markers of arterial stiffness. There was no association between sleeping patterns and CIMT  
11 in the study population.  
12  
13  
14  
15  
16  
17  
18  
19  
20  
21  
22  
23  
24  
25  
26  
27  
28  
29  
30  
31  
32  
33  
34  
35  
36  
37  
38  
39  
40  
41  
42  
43  
44  
45  
46  
47  
48  
49  
50  
51  
52  
53  
54  
55  
56  
57  
58  
59  
60

## Discussion

We have confirmed previous reports of an association between night-time sleep duration (4) and daytime sleep duration (11, 12) with metabolic risk factors. Our findings extend previous studies by investigating the association between EDS and a wide range of cardiac markers and vascular measures not previously examined. Our study has shown that in a representative sample of British men aged 71–92 years with no prior history of heart attack or HF, those who sleep more than one hour during the day have a number of adverse characteristics including higher mean levels of cardiac markers, metabolic risk factors, inflammatory and endothelial markers and reduced lung function. These findings may point to pathways for the association observed between EDS and CVD and all-cause mortality. (8)

### *EDS and metabolic and cardiac risk markers*

EDS, defined in our study as daytime sleep of >1 hour, is associated with many adverse characteristics such as obesity, physical inactivity, diabetes, breathlessness, use of antihypertensive therapy and with an adverse pattern of metabolic risk factors including HbA1c, glucose and insulin. Our results confirm previous cross-sectional analyses which have shown EDS to be associated with the metabolic syndrome and longer habitual napping duration to be associated with an increased risk of impaired fasting glucose and diabetes mellitus. (11, 12) There was a significant linear relationship between increasing daytime sleep and mean CRP levels, with those reporting EDS having higher levels of mean CRP. This confirms results from a previous study which showed self-reported daytime napping is associated with higher levels of CRP in older British adults. (25) The association seen between daytime sleep and these markers of inflammation may provide an explanation for the excess all-cause mortality observed in those with daytime napping or EDS. (8, 9) Whilst both of these studies have adjusted for diabetes, neither has adjusted for inflammation.

We found a significant association between EDS and high levels of NT-pro BNP and cTnT, both of which are biomarkers of HF. (26, 27) NT-pro BNP is produced in response to cardiac

1  
2  
3 wall stress and is a strong predictor of HF. (22) Troponin T is a plasma marker of myocyte  
4 necrosis, which has been positively associated with incident CVD, HF and all-cause  
5 mortality. (28) Most notably men who reported EDS had a higher odds of having NT-pro  
6 BNP of  $\geq 400$ pg/ml (the diagnostic threshold for HF). As far as we are aware, this is the first  
7 study to look at the association between EDS and these cardiac markers.  
8  
9

10  
11  
12  
13 A strong association was also seen between EDS and elevated vWF (marker of endothelial  
14 dysfunction) and low FEV1, markers associated with HF. These findings suggest that EDS  
15 may be an early indicator of HF. This supports a recent report from our study when the men  
16 were aged 63-82 years which showed EDS to be associated with the risk of developing overt  
17 HF during 9 year follow-up. (7) In that analyses cardiac markers and lung function were not  
18 available.  
19  
20  
21  
22  
23  
24

25  
26 The association between EDS and HF may be explained by underlying respiratory illness  
27 such as obstructive sleep apnoea (OSA). Indeed within our cohort, EDS was significantly  
28 associated with obesity, self-reported breathlessness and reduced lung function. EDS may  
29 be a result of disturbed night-time sleep and difficulty falling asleep, both of which have been  
30 associated with HF. (29, 30) However, the associations we observed with cardiac markers  
31 and lung function were not seen in men with a short or long duration of night-time sleep and  
32 further analyses showed no association between these markers and those reporting difficulty  
33 falling asleep.  
34  
35  
36  
37  
38  
39  
40  
41  
42  
43  
44

#### 45 *Non-invasive markers of arterial disease*

46  
47  
48 In contrast to night-time sleep we did not observe any significant association between  
49 daytime sleep and markers of arterial stiffness. Short night-time sleep but not long night-time  
50 sleep was associated with arterial stiffness (PWV and carotid distensibility), when compared  
51 to those sleeping 6-8.9 hours. There was no association between sleeping patterns and  
52 CIMT in the study population. This is in contrast to previous studies which have shown an  
53  
54  
55  
56  
57  
58  
59  
60

1  
2  
3 association between short night-time sleep (17) and EDS (5) with CIMT. The differences  
4  
5 observed may be due to use of brachial-ankle PWV (13, 15), rather than carotid-femoral  
6  
7 PWV, different classification of long night-time sleep (13, 14) and a younger study  
8  
9 population. (15)  
10

#### 11 12 13 14 *Strengths and limitations*

15  
16 The strengths of our study include the fact that it is a study of older men, a group who are at  
17  
18 high risk of vascular disease and the wide range of vascular parameters which we have  
19  
20 looked into. Limitations of our study include the lack of representation of women, middle  
21  
22 aged populations and ethnic minority groups which limits generalisability. Our data is based  
23  
24 on self-reported sleeping patterns at a single time point and it is possible that night-time and  
25  
26 daytime sleep duration have been misclassified. Our analysis of night-time sleep relies on  
27  
28 average duration of night-time sleep and we do not have measures of interruption or total  
29  
30 time spent in bed. As we do not have polysomnography data, we were unable to fully  
31  
32 exclude OSA as a contributing factor to our findings. We appreciate that our results are  
33  
34 based on a cross-sectional analysis and therefore causality cannot be established. It is also  
35  
36 possible that there is an element of survival bias in our data; it may be that men who  
37  
38 attended the re-examination were healthier and this may account for the null associations  
39  
40 seen.  
41  
42  
43  
44  
45

#### 46 *Conclusions*

47  
48 EDS, defined as daytime sleep of more than one hour, is associated with an adverse  
49  
50 cardiovascular profile and may be an early indicator of HF. Clinically, this is important in the  
51  
52 assessment of older patients who seek medical advice for EDS, in whom indicators of HF  
53  
54 should be sought and further investigations carried out if necessary.  
55  
56  
57  
58  
59  
60

## Disclosures

The authors report no conflicts of interest.

## Funding

The British Regional Heart Study is a British Heart Foundation (BHF) research group. This work was supported by a British Heart Foundation programme grant (RG/13/16/30528) and project grant (PG/09/024, PG/13/41/30304).

## Contributions

SGW initiated the concept and design of the paper. SZ analysed the data and drafted the manuscript. SGW, JPJH, EAE, PHW contributed to the interpretation of data. OP contributed to the analysis of the paper. EAE, JPJH, LL, PHW and SGW contributed to the acquisition of the data. All authors revised it critically for important intellectual content and approved the final version of the manuscript.

## Data sharing statement

Further details of the Study can be found on <http://www.ucl.ac.uk/pcph/research-groups-themes/brhs-pub>. For general data sharing enquiries, please contact Lucy Lennon [l.lennon@ucl.ac.uk](mailto:l.lennon@ucl.ac.uk)

1  
2  
3  
4  
5  
6  
7  
8  
9  
10  
11  
12  
13  
14  
15  
16  
17  
18  
19  
20  
21  
22  
23  
24  
25  
26  
27  
28  
29  
30  
31  
32  
33  
34  
35  
36  
37  
38  
39  
40  
41  
42  
43  
44  
45  
46  
47  
48  
49

Table 1 - Baseline characteristics of the study population

|                                            | Age mean<br>±std                  | Obese<br>(%) | Cigarette<br>Smoker<br>(%) | Inactive (%) | Manual<br>social<br>class (%) | Diabetic<br>(%) | Breathlessness<br>(%) | Using<br>Antihypertensives<br>(%) | Depression<br>(%) | CKD (%) |        |
|--------------------------------------------|-----------------------------------|--------------|----------------------------|--------------|-------------------------------|-----------------|-----------------------|-----------------------------------|-------------------|---------|--------|
| Night-time<br>Sleep<br>Duration<br>(hours) | < 6<br>(n = 213 <sup>a</sup> )    | 78.76±4.6    | 21.53                      | 0.94         | 48.36                         | 57.35           | 18.31                 | 40.72                             | 53.99             | 11.43   | 29     |
|                                            | 6-8.9<br>(n = 1126 <sup>a</sup> ) | 78.22±4.6    | 18.78                      | 3.83         | 33.66                         | 42.4            | 14.87                 | 19.32                             | 48.85             | 8.39    | 29.36  |
|                                            | ≥ 9<br>(n = 97 <sup>a</sup> )     | 79.24±4.9    | 22.11                      | 4.12         | 38.14                         | 48.45           | 19.79                 | 25                                | 52.58             | 11.34   | 38.71  |
|                                            | <b>p</b>                          | 0.05         | 0.52                       | 0.10         | 0.0002 *                      | 0.002 *         | 0.24                  | <.0001 *                          | 0.33              | 0.27    | 0.16   |
| Daytime<br>Sleep<br>Duration<br>(hours)    | 0<br>(n = 680 <sup>a</sup> )      | 77.83±4.4    | 16.1                       | 2.65         | 30.74                         | 46.1            | 12.24                 | 17.59                             | 45.88             | 7.41    | 26.42  |
|                                            | <1<br>(n = 290 <sup>a</sup> )     | 78.04±4.4    | 15.63                      | 2.76         | 33.45                         | 40              | 14.88                 | 21.61                             | 54.14             | 10.42   | 30.94  |
|                                            | 1<br>(n = 336 <sup>a</sup> )      | 78.79±4.7    | 24.17                      | 5.07         | 40.77                         | 44.61           | 20                    | 27.01                             | 49.7              | 8.98    | 32.81  |
|                                            | >1<br>(n = 130 <sup>a</sup> )     | 80.05±5      | 33.33                      | 4.62         | 58.46                         | 51.54           | 24.62                 | 41.46                             | 61.54             | 14.62   | 39.17  |
|                                            | <b>p</b>                          | <.0001 *     | <.0001 *                   | 0.18         | <.0001 *                      | 0.15            | 0.0003 *              | <.0001 *                          | 0.004 *           | 0.05    | 0.02 * |

a, maximum n in group, varies slightly with missing co-variate data

CKD, chronic kidney disease



Table 2 - Night-time sleep duration vs metabolic risk factors, inflammatory and endothelial markers, lung function and cardiac markers.

|                                                             |   | Night Sleep (hours)            |                                   |                               | P        |
|-------------------------------------------------------------|---|--------------------------------|-----------------------------------|-------------------------------|----------|
|                                                             |   | < 6<br>(n = 213 <sup>d</sup> ) | 6-8.9<br>(n = 1126 <sup>d</sup> ) | ≥ 9<br>(n = 97 <sup>d</sup> ) |          |
| <b>Metabolic risk factors [mean (95% CI)]</b>               |   |                                |                                   |                               |          |
| SBP (mmHg)                                                  | A | 146.04 (143.52, 148.56)        | 147.31 (146.21, 148.4)            | 150.73 (146.99, 154.47)       | 0.12     |
| DBP (mmHg)                                                  | A | 76.59 (75.07, 78.11)           | 77.46 (76.8, 78.12)               | 77.25 (74.99, 79.5)           | 0.59     |
| HDL-C (mmol/L)                                              | A | 1.47 (1.41, 1.53)              | 1.48 (1.45, 1.5)                  | 1.37 (1.28, 1.46)             | 0.07     |
| Triglycerides (mmol/L)                                      | A | 1.3 (1.21, 1.39)               | 1.28 (1.25, 1.32)                 | 1.39 (1.26, 1.52)             | 0.31     |
| HbA1c <sup>c</sup> (%)                                      | A | 5.93 (5.85, 6.02)              | 5.75 (5.72, 5.79)                 | 5.88 (5.76, 6)                | 0.0001 * |
|                                                             | B | 5.9 (5.82, 5.98)               | 5.76 (5.73, 5.79)                 | 5.86 (5.74, 5.97)             | 0.003 *  |
| Glucose <sup>c</sup> (mmol/L)                               | A | 5.78 (5.62, 5.94)              | 5.55 (5.48, 5.61)                 | 5.72 (5.49, 5.95)             | 0.02 *   |
|                                                             | B | 5.74 (5.58, 5.9)               | 5.56 (5.49, 5.62)                 | 5.68 (5.45, 5.91)             | 0.08     |
| Insulin <sup>c</sup> (mU/L)                                 | A | 8.26 (7.54, 9.04)              | 7.92 (7.62, 8.24)                 | 7.82 (6.84, 8.94)             | 0.69     |
| <b>Inflammatory and endothelial markers [mean (95% CI)]</b> |   |                                |                                   |                               |          |
| CRP <sup>c</sup> (mg/L)                                     | A | 1.51 (1.28, 1.78)              | 1.34 (1.25, 1.44)                 | 1.46 (1.15, 1.87)             | 0.37     |
| IL-6 <sup>c</sup> (pg/mL)                                   | A | 3.03 (2.74, 3.35)              | 2.98 (2.86, 3.11)                 | 3.72 (3.21, 4.3)              | 0.02 *   |
|                                                             | B | 2.94 (2.67, 3.25)              | 3 (2.87, 3.13)                    | 3.61 (3.12, 4.18)             | 0.05     |
| vWF (IU/dL)                                                 | A | 140.97 (130.97, 150.97)        | 133.27 (128.91, 137.63)           | 119.04 (104.2, 133.89)        | 0.06     |
| <b>Lung function [mean (95% CI)]</b>                        |   |                                |                                   |                               |          |
| FEV1 (L)                                                    | A | 2.43 (2.35, 2.5)               | 2.46 (2.42, 2.49)                 | 2.44 (2.32, 2.55)             | 0.76     |
| <b>Cardiac markers [mean (95% CI)]</b>                      |   |                                |                                   |                               |          |
| NT-pro BNP <sup>c</sup> (pg/mL)                             | A | 121.67 (101.33, 146.1)         | 126.45 (116.87, 136.81)           | 134.61 (102.8, 176.25)        | 0.83     |
| cTnT <sup>c</sup> (pg/ml)                                   | A | 11.25 (10.29, 12.3)            | 10.82 (10.41, 11.24)              | 10.14 (8.89, 11.57)           | 0.44     |

A, adjusted for age

B, adjusted for age, BMI, social class and physical activity

c, geometric mean

d, maximum n in group, varies slightly with missing co-variate data

SBP, systolic blood pressure; DBP, diastolic blood pressure; HDL-C, high density lipoprotein cholesterol; HbA1c, glycated haemoglobin; CRP, C-reactive protein; IL-6, interleukin 6; vWF, von Willebrand factor; FEV1, forced expiratory volume in 1s; NT-pro BNP, N-terminal pro brain natriuretic peptide; cTnT, cardiac troponin T

Table 3 – Daytime sleep duration vs metabolic risk factors, inflammatory and endothelial markers, lung function and cardiac markers.

|                                                             |   | Daytime Sleep Duration (Hours) |                               |                              |                               | p value trend | p value >1h vs others |
|-------------------------------------------------------------|---|--------------------------------|-------------------------------|------------------------------|-------------------------------|---------------|-----------------------|
|                                                             |   | 0<br>(n = 680 <sup>d</sup> )   | <1<br>(n = 290 <sup>d</sup> ) | 1<br>(n = 336 <sup>d</sup> ) | >1<br>(n = 130 <sup>d</sup> ) |               |                       |
| <b>Metabolic risk factors [mean (95% CI)]</b>               |   |                                |                               |                              |                               |               |                       |
| SBP (mmHg)                                                  | A | 147.46 (146.05, 148.88)        | 148.76 (146.59, 150.92)       | 147.14 (145.13, 149.15)      | 144.13 (140.88, 147.39)       | 0.90          | 0.04 *                |
|                                                             | B | 147.49 (146.07, 148.9)         | 148.59 (146.42, 150.75)       | 146.97 (144.95, 148.99)      | 144.78 (141.44, 148.11)       | 0.96          | 0.12                  |
| DBP (mmHg)                                                  | A | 77.41 (76.56, 78.26)           | 78.08 (76.77, 79.38)          | 77.16 (75.95, 78.37)         | 75.54 (73.57, 77.5)           | 0.98          | 0.06                  |
|                                                             | B | 77.56 (76.7, 78.41)            | 78.04 (76.74, 79.35)          | 76.94 (75.73, 78.16)         | 75.64 (73.63, 77.65)          | 0.74          | 0.09                  |
| HDL-C (mmol/L)                                              | A | 1.5 (1.47, 1.54)               | 1.47 (1.42, 1.52)             | 1.44 (1.39, 1.49)            | 1.33 (1.25, 1.41)             | 0.01 *        | 0.0002 *              |
|                                                             | B | 1.49 (1.46, 1.52)              | 1.46 (1.41, 1.5)              | 1.46 (1.42, 1.51)            | 1.41 (1.33, 1.48)             | 0.14          | 0.10                  |
| Triglycerides (mmol/L)                                      | A | 1.24 (1.19, 1.29)              | 1.3 (1.23, 1.38)              | 1.35 (1.28, 1.42)            | 1.42 (1.31, 1.54)             | 0.01 *        | 0.02 *                |
|                                                             | B | 1.26 (1.21, 1.3)               | 1.33 (1.26, 1.4)              | 1.33 (1.26, 1.4)             | 1.34 (1.22, 1.45)             | 0.03 *        | 0.47                  |
| HbA1c <sup>c</sup> (%)                                      | A | 5.73 (5.69, 5.78)              | 5.74 (5.68, 5.81)             | 5.87 (5.8, 5.93)             | 5.99 (5.88, 6.1)              | 0.01 *        | 0.0003 *              |
|                                                             | B | 5.75 (5.7, 5.79)               | 5.77 (5.7, 5.83)              | 5.84 (5.78, 5.91)            | 5.9 (5.79, 6.01)              | 0.04 *        | 0.04 *                |
| Glucose <sup>c</sup> (mmol/L)                               | A | 5.52 (5.43, 5.6)               | 5.48 (5.36, 5.61)             | 5.7 (5.58, 5.83)             | 5.98 (5.77, 6.2)              | 0.09          | 0.0002 *              |
|                                                             | B | 5.54 (5.45, 5.62)              | 5.51 (5.38, 5.63)             | 5.68 (5.56, 5.8)             | 5.86 (5.65, 6.07)             | 0.25          | 0.01 *                |
| Insulin <sup>c</sup> (mU/L)                                 | A | 7.5 (7.13, 7.88)               | 7.43 (6.89, 8.02)             | 8.69 (8.09, 9.33)            | 10.36 (9.21, 11.65)           | 0.01 *        | <.0001 *              |
|                                                             | B | 7.7 (7.36, 8.07)               | 7.68 (7.16, 8.24)             | 8.31 (7.77, 8.88)            | 9.29 (8.32, 10.37)            | 0.15          | 0.005 *               |
| <b>Inflammatory and endothelial markers [mean (95% CI)]</b> |   |                                |                               |                              |                               |               |                       |
| CRP <sup>c</sup> (mg/L)                                     | A | 1.24 (1.13, 1.36)              | 1.36 (1.19, 1.57)             | 1.56 (1.37, 1.78)            | 1.67 (1.35, 2.08)             | 0.01 *        | 0.07                  |
|                                                             | B | 1.27 (1.16, 1.39)              | 1.4 (1.22, 1.61)              | 1.5 (1.32, 1.71)             | 1.51 (1.21, 1.89)             | 0.04 *        | 0.37                  |
| IL-6 <sup>c</sup> (pg/mL)                                   | A | 2.88 (2.73, 3.05)              | 3.01 (2.76, 3.28)             | 3.19 (2.95, 3.45)            | 3.58 (3.14, 4.09)             | 0.03 *        | 0.01 *                |
|                                                             | B | 2.92 (2.76, 3.08)              | 3.06 (2.81, 3.33)             | 3.13 (2.89, 3.39)            | 3.34 (2.92, 3.81)             | 0.10          | 0.15                  |
| vWF (IU/dL)                                                 | A | 132.65 (127.06, 138.24)        | 127.34 (118.81, 135.87)       | 134.92 (126.85, 142.98)      | 148.03 (135.05, 161.01)       | 1.00          | 0.02 *                |
|                                                             | B | 132.76 (127.1, 138.41)         | 127.64 (119.03, 136.24)       | 134.88 (126.7, 143.07)       | 147.74 (134.39, 161.1)        | 0.96          | 0.03 *                |
| <b>Lung function [mean (95% CI)]</b>                        |   |                                |                               |                              |                               |               |                       |
| FEV1 (L)                                                    | A | 2.52 (2.48, 2.57)              | 2.46 (2.39, 2.52)             | 2.37 (2.31, 2.44)            | 2.21 (2.11, 2.31)             | <.0001 *      | <.0001 *              |
|                                                             | B | 2.52 (2.48, 2.56)              | 2.44 (2.38, 2.51)             | 2.38 (2.32, 2.44)            | 2.26 (2.15, 2.36)             | <.0001 *      | <.0001 *              |
| <b>Cardiac markers [mean (95% CI)]</b>                      |   |                                |                               |                              |                               |               |                       |
| NT-pro BNP <sup>c</sup> (pg/mL)                             | A | 122.31 (110.53, 135.34)        | 110.95 (95.15, 129.37)        | 135.15 (117.08, 156.02)      | 171.15 (134.5, 217.78)        | 0.70          | 0.01 *                |
|                                                             | B | 123.28 (111.4, 136.43)         | 111.2 (95.39, 129.62)         | 135.76 (117.52, 156.82)      | 167.33 (130.92, 213.88)       | 0.82          | 0.02 *                |
| cTnT <sup>c</sup> (pg/ml)                                   | A | 10.33 (9.83, 10.85)            | 10.45 (9.7, 11.27)            | 11.59 (10.8, 12.43)          | 12.79 (11.37, 14.38)          | 0.03 *        | 0.004 *               |
|                                                             | B | 10.41 (9.91, 10.93)            | 10.52 (9.77, 11.33)           | 11.31 (10.55, 12.13)         | 12.3 (10.93, 13.86)           | 0.12          | 0.03 *                |

1  
2  
3  
4  
5 A, adjusted for age

6 B, adjusted for age, BMI, social class and physical activity

7  
8 c, geometric mean

9  
10 d, maximum n in group, varies slightly with missing co-variate data

11 SBP, systolic blood pressure; DBP, diastolic blood pressure; HDL-C, high density lipoprotein cholesterol; HbA1c, glycated haemoglobin; CRP, C-reactive  
12 protein; IL-6, interleukin 6; vWF, von Willebrand factor; FEV1, forced expiratory volume in 1s; NT-pro BNP, N-terminal pro brain natriuretic peptide; cTnT,  
13 cardiac troponin T  
14  
15  
16  
17  
18  
19  
20  
21  
22  
23  
24  
25  
26  
27  
28  
29  
30  
31  
32  
33  
34  
35  
36  
37  
38  
39  
40  
41  
42  
43  
44  
45  
46  
47  
48  
49

Table 4 – Sleeping patterns vs non-invasive vascular measurements.

|                                            |                                | CIMT (mm)         |                             | PWV (m/s)            |                             | Distensibility ( $10^{-3}\text{kPa}^{-1}$ ) |                             |
|--------------------------------------------|--------------------------------|-------------------|-----------------------------|----------------------|-----------------------------|---------------------------------------------|-----------------------------|
|                                            |                                | Age-adjusted      | Additional Adj <sup>a</sup> | Age-adjusted         | Additional Adj <sup>a</sup> | Age-adjusted                                | Additional Adj <sup>a</sup> |
|                                            |                                | mean (95% CI)     | mean (95% CI)               | mean (95% CI)        | mean (95% CI)               | mean (95% CI)                               | mean (95% CI)               |
| Night-time<br>Sleep<br>Duration<br>(hours) | < 6 (n = 209 <sup>b</sup> )    | 0.81 (0.78, 0.83) | 0.8 (0.78, 0.82)            | 10.48 (10.24, 10.71) | 10.45 (10.22, 10.69)        | 11.66 (11.11, 12.21)                        | 11.62 (11.06, 12.18)        |
|                                            | 6-8.9 (n = 1125 <sup>b</sup> ) | 0.81 (0.8, 0.82)  | 0.81 (0.8, 0.82)            | 10.18 (10.08, 10.27) | 10.18 (10.08, 10.28)        | 12.29 (12.06, 12.53)                        | 12.31 (12.08, 12.55)        |
|                                            | ≥ 9 (n = 95 <sup>b</sup> )     | 0.82 (0.79, 0.85) | 0.82 (0.79, 0.85)           | 10.25 (9.91, 10.6)   | 10.25 (9.9, 10.59)          | 11.71 (10.9, 12.51)                         | 11.81 (11, 12.63)           |
|                                            | <b>p</b>                       | 0.67              | 0.64                        | 0.07                 | 0.11                        | 0.06                                        | 0.06                        |
| Daytime<br>Sleep<br>Duration<br>(hours)    | 0 (n = 677 <sup>b</sup> )      | 0.81 (0.79, 0.82) | 0.81 (0.8, 0.82)            | 10.25 (10.12, 10.38) | 10.25 (10.12, 10.38)        | 12.23 (11.93, 12.53)                        | 12.2 (11.89, 12.5)          |
|                                            | <1 (n = 290 <sup>b</sup> )     | 0.81 (0.79, 0.82) | 0.81 (0.79, 0.82)           | 10.15 (9.96, 10.35)  | 10.16 (9.96, 10.36)         | 12.49 (12.03, 12.96)                        | 12.5 (12.04, 12.97)         |
|                                            | 1 (n = 334 <sup>b</sup> )      | 0.8 (0.79, 0.82)  | 0.8 (0.78, 0.82)            | 10.2 (10.01, 10.38)  | 10.2 (10.01, 10.38)         | 11.81 (11.38, 12.25)                        | 11.88 (11.44, 12.32)        |
|                                            | >1 (n = 128 <sup>b</sup> )     | 0.84 (0.81, 0.87) | 0.83 (0.8, 0.86)            | 10.29 (9.99, 10.6)   | 10.29 (9.98, 10.6)          | 11.96 (11.25, 12.67)                        | 12.12 (11.39, 12.85)        |
| <b>p</b>                                   | 0.17                           | 0.37              | 0.80                        | 0.85                 | 0.18                        | 0.30                                        |                             |

a, adjusted for age, BMI, social class and physical activity

b, maximum n in group

CIMT, carotid intima-media thickness; PWV, pulse wave velocity

## Bibliography

1. Flamer HE. Sleep disorders in the elderly. *Australian and New Zealand Journal of Medicine*. 1996;26(1):96-104.
2. Grandner MA, Sands-Lincoln MR, Pak VM, Garland SN. Sleep duration, cardiovascular disease, and proinflammatory biomarkers. *Nature and science of sleep*. 2013;5:93-107.
3. Jackson CL, Redline S, Emmons KM. Sleep as a potential fundamental contributor to disparities in cardiovascular health. *Annual review of public health*. 2015;36:417-40.
4. Knutson KL. Sleep duration and cardiometabolic risk: a review of the epidemiologic evidence. *Best practice & research Clinical endocrinology & metabolism*. 2010;24(5):731-43.
5. Blachier M, Dauvilliers Y, Jaussent I, Helmer C, Ritchie K, Jouven X, et al. Excessive daytime sleepiness and vascular events: the Three City Study. *Annals of neurology*. 2012;71(5):661-7.
6. Newman AB, Spiekerman CF, Enright P, Lefkowitz D, Manolio T, Reynolds CF, et al. Daytime sleepiness predicts mortality and cardiovascular disease in older adults. The Cardiovascular Health Study Research Group. *Journal of the American Geriatrics Society*. 2000;48(2):115-23.
7. Wannamethee SG, Papacosta O, Lennon L, Whincup PH. Self-Reported Sleep Duration, Napping, and Incident Heart Failure: Prospective Associations in the British Regional Heart Study. *Journal of the American Geriatrics Society*. 2016.
8. Leng Y, Wainwright NW, Cappuccio FP, Surtees PG, Hayat S, Luben R, et al. Daytime napping and the risk of all-cause and cause-specific mortality: a 13-year follow-up of a British population. *American journal of epidemiology*. 2014;179(9):1115-24.
9. Tanabe N, Iso H, Seki N, Suzuki H, Yatsuya H, Toyoshima H, et al. Daytime napping and mortality, with a special reference to cardiovascular disease: the JACC study. *International journal of epidemiology*. 2010;39(1):233-43.
10. Zhong G, Wang Y, Tao T, Ying J, Zhao Y. Daytime napping and mortality from all causes, cardiovascular disease, and cancer: a meta-analysis of prospective cohort studies. *Sleep medicine*. 2015;16(7):811-9.
11. Hayley AC, Williams LJ, Kennedy GA, Berk M, Brennan SL, Pasco JA. Excessive daytime sleepiness and metabolic syndrome: a cross-sectional study. *Metabolism*. 2015;64(2):244-52.
12. Fang W, Li Z, Wu L, Cao Z, Liang Y, Yang H, et al. Longer habitual afternoon napping is associated with a higher risk for impaired fasting plasma glucose and diabetes mellitus in older adults: results from the Dongfeng–Tongji cohort of retired workers. *Sleep medicine*. 2013;14(10):950-4.
13. Tsai TC, Wu JS, Yang YC, Huang YH, Lu FH, Chang CJ. Long sleep duration associated with a higher risk of increased arterial stiffness in males. *Sleep*. 2014;37(8):1315-20.
14. Abe T, Aoki T, Yata S, Okada M. Sleep duration is significantly associated with carotid artery atherosclerosis incidence in a Japanese population. *Atherosclerosis*. 2011;217(2):509-13.
15. Yoshioka E, Saijo Y, Kita T, Okada E, Satoh H, Kawaharada M, et al. Relation between self-reported sleep duration and arterial stiffness: a cross-sectional study of middle-aged Japanese civil servants. *Sleep*. 2011;34(12):1681-6.
16. Wolff B, Volzke H, Schwahn C, Robinson D, Kessler C, John U. Relation of self-reported sleep duration with carotid intima-media thickness in a general population sample. *Atherosclerosis*. 2008;196(2):727-32.
17. Nakazaki C, Noda A, Koike Y, Yamada S, Murohara T, Ozaki N. Association of insomnia and short sleep duration with atherosclerosis risk in the elderly. *American journal of hypertension*. 2012;25(11):1149-55.
18. Lennon LT, Ramsay SE, Papacosta O, Shaper AG, Wannamethee SG, Whincup PH. Cohort Profile Update: The British Regional Heart Study 1978-2014: 35 years follow-up

- 1  
2  
3 of cardiovascular disease and ageing. *International journal of epidemiology*.  
4 2015;44(3):826-g.
- 5 19. Ramsay SE, Arianayagam DS, Whincup PH, Lennon LT, Cryer J, Papacosta AO, et al.  
6 Cardiovascular risk profile and frailty in a population-based study of older British men.  
7 *Heart (British Cardiac Society)*. 2015;101(8):616-22.
- 8 20. Wannamethee SG, Lowe GD, Whincup PH, Rumley A, Walker M, Lennon L. Physical  
9 activity and hemostatic and inflammatory variables in elderly men. *Circulation*.  
10 2002;105(15):1785-90.
- 11 21. Wannamethee SG, Whincup PH, Shaper AG, Rumley A, Lennon L, Lowe GDO.  
12 Circulating inflammatory and hemostatic biomarkers are associated with risk of  
13 myocardial infarction and coronary death, but not angina pectoris, in older men. *Journal*  
14 *of Thrombosis and Haemostasis*. 2009;7(10):1605-11.
- 15 22. Wannamethee GS, Welsh P, Whincup PH, Lennon L, Papacosta O, Sattar N. N-terminal  
16 pro brain natriuretic peptide but not copeptin improves prediction of heart failure over  
17 other routine clinical risk parameters in older men with and without cardiovascular  
18 disease: population-based study. *European Journal of Heart Failure*. 2014;16(1):25-32.
- 19 23. National Institute for Clinical Excellence. Chronic heart failure: the management of  
20 adults with chronic heart failure in primary and secondary care (partial update). (Clinical  
21 guideline 108) 2010 [Available from: <http://www.nice.org.uk/CG108>.  
22
- 23 24. Dijk JM, Algra A, van der Graaf Y, Grobbee DE, Bots ML. Carotid stiffness and the risk  
24 of new vascular events in patients with manifest cardiovascular disease. *The SMART*  
25 *study*. *European heart journal*. 2005;26(12):1213-20.
- 26 25. Leng Y, Ahmadi-Abhari S, Wainwright NWJ, Cappuccio FP, Surtees PG, Luben R, et al.  
27 Daytime napping, sleep duration and serum C reactive protein: a population-based  
28 cohort study. *BMJ Open*. 2014;4(11):e006071.
- 29 26. Kociol RD, Pang PS, Gheorghiade M, Fonarow GC, O'Connor CM, Felker GM. Troponin  
30 Elevation in Heart Failure Prevalence, Mechanisms, and Clinical Implications. *Journal of*  
31 *the American College of Cardiology*. 2010;56(14):1071-8.
- 32 27. Kragelund C, Grønning B, Køber L, Hildebrandt P, Steffensen R. N-Terminal Pro-B-  
33 Type Natriuretic Peptide and Long-Term Mortality in Stable Coronary Heart Disease.  
34 *New England Journal of Medicine*. 2005;352(7):666-75.
- 35 28. Sato Y, Fujiwara H, Takatsu Y. Biochemical markers in heart failure. *Journal of*  
36 *cardiology*. 2012;59(1):1-7.
- 37 29. Laugsand LE, Strand LB, Platou C, Vatten LJ, Janszky I. Insomnia and the risk of  
38 incident heart failure: a population study. *European heart journal*. 2014;35(21):1382-93.
- 39 30. Ingelsson E, Lind L, Ärnlöv J, Sundström J. Sleep disturbances independently predict  
40 heart failure in overweight middle-aged men. *European Journal of Heart Failure*.  
41 2007;9(2):184-90.
- 42  
43  
44  
45  
46  
47  
48  
49  
50  
51  
52  
53  
54  
55  
56  
57  
58  
59  
60

## STROBE Statement—checklist of items that should be included in reports of observational studies

|                              | Item No | Recommendation                                                                                                                                                                                                                                                                                                                                                                                                                                                                                                                                                                                                                                                                                                                |
|------------------------------|---------|-------------------------------------------------------------------------------------------------------------------------------------------------------------------------------------------------------------------------------------------------------------------------------------------------------------------------------------------------------------------------------------------------------------------------------------------------------------------------------------------------------------------------------------------------------------------------------------------------------------------------------------------------------------------------------------------------------------------------------|
| <b>Title and abstract</b>    | 1       | (a) Indicate the study's design with a commonly used term in the title or the abstract – <b>PAGE 1</b><br>(b) Provide in the abstract an informative and balanced summary of what was done and what was found – <b>PAGE 2</b>                                                                                                                                                                                                                                                                                                                                                                                                                                                                                                 |
| <b>Introduction</b>          |         |                                                                                                                                                                                                                                                                                                                                                                                                                                                                                                                                                                                                                                                                                                                               |
| Background/rationale         | 2       | Explain the scientific background and rationale for the investigation being reported – <b>PAGE 4</b>                                                                                                                                                                                                                                                                                                                                                                                                                                                                                                                                                                                                                          |
| Objectives                   | 3       | State specific objectives, including any prespecified hypotheses - <b>PAGE 4</b>                                                                                                                                                                                                                                                                                                                                                                                                                                                                                                                                                                                                                                              |
| <b>Methods</b>               |         |                                                                                                                                                                                                                                                                                                                                                                                                                                                                                                                                                                                                                                                                                                                               |
| Study design                 | 4       | Present key elements of study design early in the paper - <b>PAGE 5-7</b>                                                                                                                                                                                                                                                                                                                                                                                                                                                                                                                                                                                                                                                     |
| Setting                      | 5       | Describe the setting, locations, and relevant dates, including periods of recruitment, exposure, follow-up, and data collection - <b>PAGE 5-7</b>                                                                                                                                                                                                                                                                                                                                                                                                                                                                                                                                                                             |
| Participants                 | 6       | (a) <i>Cohort study</i> —Give the eligibility criteria, and the sources and methods of selection of participants. Describe methods of follow-up – <b>PAGE 5</b><br><i>Case-control study</i> —Give the eligibility criteria, and the sources and methods of case ascertainment and control selection. Give the rationale for the choice of cases and controls<br><i>Cross-sectional study</i> —Give the eligibility criteria, and the sources and methods of selection of participants<br>(b) <i>Cohort study</i> —For matched studies, give matching criteria and number of exposed and unexposed – <b>N/A</b><br><i>Case-control study</i> —For matched studies, give matching criteria and the number of controls per case |
| Variables                    | 7       | Clearly define all outcomes, exposures, predictors, potential confounders, and effect modifiers. Give diagnostic criteria, if applicable – <b>PAGE 5-7</b>                                                                                                                                                                                                                                                                                                                                                                                                                                                                                                                                                                    |
| Data sources/<br>measurement | 8*      | For each variable of interest, give sources of data and details of methods of assessment (measurement). Describe comparability of assessment methods if there is more than one group – <b>PAGE 5-7</b>                                                                                                                                                                                                                                                                                                                                                                                                                                                                                                                        |
| Bias                         | 9       | Describe any efforts to address potential sources of bias – <b>PAGE 13</b>                                                                                                                                                                                                                                                                                                                                                                                                                                                                                                                                                                                                                                                    |
| Study size                   | 10      | Explain how the study size was arrived at - <b>PAGE 5</b>                                                                                                                                                                                                                                                                                                                                                                                                                                                                                                                                                                                                                                                                     |
| Quantitative variables       | 11      | Explain how quantitative variables were handled in the analyses. If applicable, describe which groupings were chosen and why – <b>PAGE 5-7</b>                                                                                                                                                                                                                                                                                                                                                                                                                                                                                                                                                                                |
| Statistical methods          | 12      | (a) Describe all statistical methods, including those used to control for confounding - <b>PAGE 7</b><br>(b) Describe any methods used to examine subgroups and interactions – <b>PAGE 7</b><br>(c) Explain how missing data were addressed – <b>PAGE 5-6</b><br>(d) <i>Cohort study</i> —If applicable, explain how loss to follow-up was addressed – <b>N/A</b><br><i>Case-control study</i> —If applicable, explain how matching of cases and controls was addressed<br><i>Cross-sectional study</i> —If applicable, describe analytical methods taking account of sampling strategy<br>(e) Describe any sensitivity analyses – <b>N/A</b>                                                                                 |

Continued on next page

**Results**

|                  |     |                                                                                                                                                                                                                                                                                                                                                                                                                                                             |
|------------------|-----|-------------------------------------------------------------------------------------------------------------------------------------------------------------------------------------------------------------------------------------------------------------------------------------------------------------------------------------------------------------------------------------------------------------------------------------------------------------|
| Participants     | 13* | (a) Report numbers of individuals at each stage of study—eg numbers potentially eligible, examined for eligibility, confirmed eligible, included in the study, completing follow-up, and analysed – <b>PAGE 5-6</b><br>(b) Give reasons for non-participation at each stage – <b>PAGE 5</b><br>(c) Consider use of a flow diagram – <b>N/A</b>                                                                                                              |
| Descriptive data | 14* | (a) Give characteristics of study participants (eg demographic, clinical, social) and information on exposures and potential confounders – <b>PAGE 7-8, 15</b><br>(b) Indicate number of participants with missing data for each variable of interest – <b>PAGE 15-19</b><br>(c) <i>Cohort study</i> —Summarise follow-up time (eg, average and total amount) – <b>PAGE 5</b>                                                                               |
| Outcome data     | 15* | <i>Cohort study</i> —Report numbers of outcome events or summary measures over time – <b>PAGE 15-19</b><br><i>Case-control study</i> —Report numbers in each exposure category, or summary measures of exposure<br><i>Cross-sectional study</i> —Report numbers of outcome events or summary measures                                                                                                                                                       |
| Main results     | 16  | (a) Give unadjusted estimates and, if applicable, confounder-adjusted estimates and their precision (eg, 95% confidence interval). Make clear which confounders were adjusted for and why they were included – <b>PAGE 15-19</b><br>(b) Report category boundaries when continuous variables were categorized – <b>N/A</b><br>(c) If relevant, consider translating estimates of relative risk into absolute risk for a meaningful time period – <b>N/A</b> |
| Other analyses   | 17  | Report other analyses done—eg analyses of subgroups and interactions, and sensitivity analyses – <b>PAGE 9-10</b>                                                                                                                                                                                                                                                                                                                                           |

**Discussion**

|                  |    |                                                                                                                                                                                                |
|------------------|----|------------------------------------------------------------------------------------------------------------------------------------------------------------------------------------------------|
| Key results      | 18 | Summarise key results with reference to study objectives – <b>PAGE 7-10</b>                                                                                                                    |
| Limitations      | 19 | Discuss limitations of the study, taking into account sources of potential bias or imprecision. Discuss both direction and magnitude of any potential bias – <b>PAGE 13</b>                    |
| Interpretation   | 20 | Give a cautious overall interpretation of results considering objectives, limitations, multiplicity of analyses, results from similar studies, and other relevant evidence – <b>PAGE 11-13</b> |
| Generalisability | 21 | Discuss the generalisability (external validity) of the study results – <b>PAGE 13</b>                                                                                                         |

**Other information**

|         |    |                                                                                                                                                                                |
|---------|----|--------------------------------------------------------------------------------------------------------------------------------------------------------------------------------|
| Funding | 22 | Give the source of funding and the role of the funders for the present study and, if applicable, for the original study on which the present article is based – <b>PAGE 14</b> |
|---------|----|--------------------------------------------------------------------------------------------------------------------------------------------------------------------------------|

\*Give information separately for cases and controls in case-control studies and, if applicable, for exposed and unexposed groups in cohort and cross-sectional studies.

**Note:** An Explanation and Elaboration article discusses each checklist item and gives methodological background and published examples of transparent reporting. The STROBE checklist is best used in conjunction with this article (freely available on the Web sites of PLoS Medicine at <http://www.plosmedicine.org/>, Annals of Internal Medicine at <http://www.annals.org/>, and Epidemiology at <http://www.epidem.com/>). Information on the STROBE Initiative is available at [www.strobe-statement.org](http://www.strobe-statement.org).



# BMJ Open

## Self-reported sleep duration and napping, cardiac risk factors and markers of subclinical vascular disease: cross-sectional study in older men

|                                 |                                                                                                                                                                                                                                                                                                                                                                                                                                                                                                                             |
|---------------------------------|-----------------------------------------------------------------------------------------------------------------------------------------------------------------------------------------------------------------------------------------------------------------------------------------------------------------------------------------------------------------------------------------------------------------------------------------------------------------------------------------------------------------------------|
| Journal:                        | <i>BMJ Open</i>                                                                                                                                                                                                                                                                                                                                                                                                                                                                                                             |
| Manuscript ID                   | bmjopen-2017-016396.R1                                                                                                                                                                                                                                                                                                                                                                                                                                                                                                      |
| Article Type:                   | Research                                                                                                                                                                                                                                                                                                                                                                                                                                                                                                                    |
| Date Submitted by the Author:   | 27-Apr-2017                                                                                                                                                                                                                                                                                                                                                                                                                                                                                                                 |
| Complete List of Authors:       | Zonoozi, Shahrzad; UCL, Department of Primary Care & Population Health<br>Ramsay, Sheena; Newcastle University, Institute of Health & Society<br>Papacosta, Olia; University College London,<br>Lennon, Lucy; UCL, Department of Primary Care and Population Health<br>Ellins, Elizabeth; Swansea University, Institute of Life Sciences<br>Halcox, Julian; Swansea University, Department of Cardiology<br>Whincup, Peter; St George's University of London,<br>Wannamethee, Goya; UCL, Primary Care and Population Health |
| <b>Primary Subject Heading</b>: | Epidemiology                                                                                                                                                                                                                                                                                                                                                                                                                                                                                                                |
| Secondary Subject Heading:      | Cardiovascular medicine                                                                                                                                                                                                                                                                                                                                                                                                                                                                                                     |
| Keywords:                       | Sleep patterns, Cardiac function, Subclinical atherosclerosis                                                                                                                                                                                                                                                                                                                                                                                                                                                               |
|                                 |                                                                                                                                                                                                                                                                                                                                                                                                                                                                                                                             |

SCHOLARONE™  
Manuscripts

Only

1  
2  
3 **Self-reported sleep duration and napping, cardiac risk factors and markers of**  
4 **subclinical vascular disease: cross-sectional study in older men**  
5  
6

7  
8 Shahrzad Zonoozi<sup>1</sup>; Sheena E Ramsay<sup>2</sup>; Olia Papacosta<sup>1</sup>; Lucy Lennon<sup>1</sup>; Elizabeth A Ellins<sup>3</sup>;  
9  
10 Julian P J Halcox<sup>3</sup>; Peter H Whincup<sup>4</sup>; S Goya Wannamethee<sup>1</sup>  
11

12  
13 <sup>1</sup> UCL Department of Primary Care & Population Health, UCL Medical School, Rowland Hill  
14 Street, London, NW3 2PF, UK  
15

16  
17  
18 <sup>2</sup> Institute of Health & Society, Newcastle University, Richardson Road, Newcastle upon  
19 Tyne, NE2 4AX, UK  
20

21  
22  
23 <sup>3</sup> Institute of Life Sciences, Swansea University, Singleton Park, Swansea, SA2 8PP, UK  
24

25  
26 <sup>4</sup> Population Health Research Institute, St George's University of London, Cranmer Terrace,  
27 London, SW17 0RE, UK  
28  
29

30  
31  
32  
33 **Corresponding author:**  
34

35  
36 Shahrzad Zonoozi, UCL Department of Primary Care & Population Health, UCL Medical  
37 School, Rowland Hill Street, London, NW3 2PF, UK. Email: shahrzadz@gmail.com  
38

39  
40 Word count: 3595; 4 tables  
41

42  
43  
44  
45  
46 Keywords: sleep patterns, cardiac function, subclinical atherosclerosis  
47  
48  
49  
50  
51  
52  
53  
54  
55  
56  
57  
58  
59  
60

## Abstract

**Study Objectives:** Daytime sleep has been associated with increased risk of cardiovascular disease and heart failure (HF) but the mechanisms remain unclear. We have investigated the association between daytime and night-time sleep patterns and cardiovascular risk markers in older adults including cardiac markers and subclinical markers of atherosclerosis [arterial stiffness and carotid intima-media thickness (CIMT)].

**Methods:** Cross sectional study of 1722 surviving men aged 71-92 examined in 2010-2012 across 24 British towns, from a prospective study initiated in 1978-1980. Participants completed a questionnaire and were invited for a physical examination. Men with a history of heart attack or HF (n = 251) were excluded from the analysis.

**Results:** Self-reported daytime sleep duration was associated with higher fasting glucose and insulin levels (p = 0.02 and 0.01 respectively) even after adjustment for age, BMI, physical activity and social class. Compared to those with no daytime sleep, men with daytime sleep >1 hour, defined as excessive daytime sleepiness (EDS), had a higher risk of raised N-terminal pro brain natriuretic peptide (NT-pro BNP) of  $\geq 400$ pg/ml, the diagnostic threshold for HF [OR (95% CI) = 1.88 (1.15, 3.1)], higher mean troponin (cTnT), reduced lung function (forced expiratory volume in 1s) and elevated von Willebrand factor (vWF), a marker of endothelial dysfunction. However, EDS was unrelated to CIMT and arterial stiffness. By contrast night-time sleep was only associated with HbA1c (short or long sleep) and arterial stiffness (short sleep).

**Conclusions:** Daytime sleep duration of >1 hour may be an early indicator of HF.

Word count: 248

## Article Summary

### Strength and limitations of this study

- To the best of our knowledge, this is the first study to look at the association between excessive daytime sleepiness (EDS), cardiac markers and vascular parameters.
- Owing to a lack of data, we do not know if the associations seen are true for women, middle aged populations and ethnic minorities.
- As we do not have polysomnography data, we were unable to fully exclude obstructive sleep apnoea as a contributing factor to our findings.
- Our results are based on a cross-sectional analysis and therefore causality cannot be established.

## Introduction

Sleep disturbance is a common complaint, especially amongst older adults. (1) It is increasingly recognised that there is a U shaped association between sleep duration and risk of cardiovascular disease (CVD) and metabolic disturbances – i.e. both short and long sleep durations are associated with an increased risk. (2-4) More recently, studies have shown excessive daytime sleepiness (EDS), one of the more common sleep disturbances reported in the older population, to be associated with increased risks of CVD (5, 6), heart failure (HF) (6, 7) and all-cause mortality. (8-10)

The mechanism of the association between EDS and CVD risk remains unclear. Whilst some studies have looked at the association between EDS and metabolic risk markers (11, 12), few have examined mechanisms by which EDS may influence CVD and in particular incident HF. (6) In particular, the association between EDS and markers of arterial disease and surrogate markers of cardiac function, including NT-pro brain natriuretic peptide (BNP), a marker of ventricular stress, and cardiac troponin T (cTnT), a marker of myocardial injury, have been less studied. Sub-clinical arterial disease markers are increasingly being used as early predictors for atherosclerosis and CVD. A number of non-invasive assessments have been developed, including measures of atherosclerosis such as carotid intima-media thickness (CIMT) and indirect measures of arterial stiffness including carotid distensibility and pulse wave velocity (PWV). Although a number of studies have examined the association between night-time sleep duration and arterial stiffness, (13-17) studies on the association between EDS and vascular risk markers are limited. (5) We have therefore examined the association between daytime sleep as well as night-time sleep with vascular risk factors including metabolic risk factors, inflammatory and endothelial markers, cardiac markers and measures of sub-clinical arterial disease (including arterial stiffness and CIMT).

## Methods

The British Regional Heart Study is a prospective study which recruited a socioeconomically and geographically representative cohort of 7735 men from 24 British towns between 1978 and 1980. The present investigation is based on a reassessment in 2010-2012, when all surviving men (n = 3137), aged between 71–92 years, were sent a postal questionnaire and invited for a 30<sup>th</sup> year re-examination. 2137 (68%) men completed the postal questionnaire and 1722 (55%) men attended the re-examination. (18) Blood samples were collected after fasting for a minimum of six hours and were stored at -70°C. Ethical approval for data collection was obtained from the relevant research ethics committee. The men were asked if a doctor had ever told them they had a heart attack or HF and these men were excluded from the analysis (n = 251). Of the men with no history of heart attack or HF, 1471 men had physical, blood and ultrasound measurements carried out. This present study is a cross-sectional analysis of the data from the 2010-2012 questionnaires and re-examination.

*CVD risk factors:* Physical examination included blood pressure (BP), lung function as well as height and weight, from which body mass index (BMI) was calculated. (19) Height standardised forced expiratory volume in 1 second (FEV1) was measured using the Vitalograph Compact II. Details of measurement and classification for smoking status and physical activity in this cohort have been previously described. (20) Details of the men's medication history, including use of antihypertensive, hypnotic and anxiolytic medication, were recorded at the examination and participants were also asked to report symptoms of breathlessness. Measurements of metabolic, inflammatory and endothelial markers were taken as described previously. (19, 21, 22) NT-pro BNP and cTnT were measured using the Elecsys 2010 electrochemiluminescence method (Roche Diagnostics, Burgess Hill, UK). The lowest detectable value of cTnT was 5 and for anyone with a recorded reading of < 5, we used half of the lowest detectable value (i.e. 2.5). NT-pro BNP ≥400pg/ml was defined as high, as per current guidelines issued by the National Institute of Clinical Excellence (NICE)

1  
2  
3 for the diagnosis of HF. (23) Prevalent diabetes included men with doctor-diagnosed  
4 diabetes and men with fasting blood glucose  $\geq 7$  mmol/L. 1402 men had at least one blood  
5 measurement (69 missing). Chronic kidney disease (CKD) was defined as estimated  
6 glomerular filtration rate of less than 60 using the CKD Epidemiology Collaboration (CKD-  
7 EPI) creatinine equation. (24)

8  
9  
10  
11  
12  
13 *Sleep parameters:* Reported duration of night sleep was based on response to: "On average,  
14 how many hours of sleep do you have each night?" Duration of day sleep was based on  
15 response to "On average, how much sleep (if any) do you have during the daytime?" If a  
16 response was entered for the night sleep question but no response was indicated for the day  
17 sleep question, the answer was set to 0. 1436 men completed the questions on night-time  
18 and daytime sleep duration (35 missing). Night-time sleep was categorised into three  
19 groups:  $< 6$ , 6-8.9 and  $\geq 9$  hours. Daytime sleep was categorised into four groups: 0 hours,  $< 1$   
20 hour, 1 hour and  $> 1$  hour. Those sleeping  $> 1$  hour during the daytime were defined as  
21 having EDS.  
22  
23  
24  
25  
26  
27  
28  
29  
30  
31

32 *Non-invasive markers of arterial disease:* Measurements were measured by two vascular  
33 technicians in series. Left and right carotid arteries were imaged using a Z.One Ultra  
34 ultrasound system (Zonare Medical Systems, Mountain View, CA) with a 5-10-mHz linear  
35 probe. A cross sectional sweep from the base of the common carotid artery to the jaw bone  
36 and longitudinal images of the common carotid artery approximately 1cm proximal to the  
37 carotid bifurcation were recorded. Peak systolic and end-diastolic common carotid artery  
38 diameter and CIMT, the distance between the leading edge of the intima and the media-  
39 adventitia interface, were measured using Carotid Analyser software (Medical Imaging  
40 Applications, Iowa City, IA). From the longitudinal images, a region of interest (5-10 mm)  
41 was selected in a plaque free area, at least 1cm from the bifurcation.  
42  
43  
44  
45  
46  
47  
48  
49  
50  
51

52  
53 CIMT was measured from three end-diastolic images on each side and a mean of these  
54 measures was calculated. Maximum and minimum carotid artery diameter was assessed  
55 from three consecutive waveforms and mean distension was calculated as: maximum  
56  
57  
58  
59  
60

1  
2  
3 diameter – minimum diameter. The distensibility coefficient was then calculated as described  
4  
5 by Dijk *et al.*: distensibility coefficient = [(2 x mean distension/baseline diameter)/mean pulse  
6  
7 pressure (kPa)]\*1000. (25) Carotid to femoral PWV was assessed using a Vicorder  
8  
9 (Skidmore Medical, Bristol UK), with participants in a semi-supine position with their torso at  
10  
11 approximately 30°. A 2x9cm cuff was positioned around the neck with the bladder over the  
12  
13 right carotid pulse, and a Hokanson SC10 cuff around the middle of the right thigh. Path  
14  
15 length was measured from the sternal notch to the centre of the thigh cuff. The cuffs were  
16  
17 simultaneously inflated and traces with a minimum of 3 good quality waveforms recorded.  
18  
19 Two PWV measurements, within  $\leq 0.5$ m/s of each other, were accepted and averaged. 1464  
20  
21 men had at least one non-invasive vascular measurement carried out (7 missing).  
22

23  
24 *Statistical analysis:* Distributions of HbA1c, glucose, insulin, CRP, IL-6, NT-pro BNP and  
25  
26 cTnT were highly skewed and log transformation was used. Comparisons of baseline  
27  
28 characteristics between the sleep groups were carried out using the chi squared test for  
29  
30 categorical variables and analysis of variance for continuous variables. Logistic regression  
31  
32 models were used to assess the differences in outcomes between categorical groups. In  
33  
34 multivariate analyses, age, BMI, physical activity and social class were fitted as continuous  
35  
36 variables whilst prevalent diabetes and use of antihypertensive medications was defined as  
37  
38 categorical variables. The base groups for the statistical analysis were the group sleeping 6-  
39  
40 8.9 hours in the night-time sleep group. A threshold effect was seen in those sleeping >1  
41  
42 hour in the daytime and therefore we compared those sleeping >1 hour with those sleeping  
43  
44  $\leq 1$ . We also carried out statistical analysis of the trend in the daytime sleep group. All  
45  
46 analyses were performed using SAS version 9.3 (SAS, Cary, North Carolina).  
47  
48  
49  
50

## 51 Results

52  
53 The average duration of night-time sleep in the men who responded was 6.8 hours ( $\pm 1.4$   
54  
55 hours). 15% of the men reported night-time sleep duration of less than 6 hours, while 7%  
56  
57 reported sleeping  $\geq 9$  hours during the night. 47% of men reported no daytime sleep whilst  
58  
59  
60



1  
2  
3 9% reported EDS. Night-time sleep duration was significantly associated with EDS ( $p =$   
4 0.004), with a smaller proportion of those sleeping  $\geq 9$  hours reporting EDS. Daytime sleep  
5 duration was significantly associated with night-time sleep of less than 6 hours ( $p = 0.02$ ).  
6  
7  
8  
9

### 10 11 12 *Baseline characteristics*

13  
14 Table 1 describes the baseline characteristics of the study population according to night-time  
15 and daytime sleep patterns. A U-shaped relationship was seen between night-time sleep  
16 and CVD risk factors. Both short and long night-time sleep were associated with increased  
17 age, increased prevalence of physical inactivity, manual workers and breathlessness  
18 compared to those with 6-8.9 hours sleep. There was a significant association between  
19 night-time sleep and use of hypnotic or anxiolytic medications. Daytime sleep is strongly  
20 associated with older age and with many adverse characteristics including physical inactivity,  
21 obesity, prevalent diabetes, breathlessness, use of anti-hypertensive medication, depression  
22 and CKD. The prevalence of these adverse factors tended to increase with increasing  
23 duration of daytime sleep. Daytime sleep was not associated with use of hypnotic or  
24 anxiolytic medications.  
25  
26  
27  
28  
29  
30  
31  
32  
33  
34  
35  
36  
37  
38  
39

### 40 *Night-time sleep and cardiovascular risk markers*

41  
42 There was a U-shaped association between night-time sleep and metabolic risk factors  
43 including HbA1c and glucose (Table 2). The association between night-time sleep and  
44 HbA1c remained significant following adjustment for daytime sleep ( $p = 0.04$ ). In age-  
45 adjusted analysis, night-time sleep was significantly associated with IL-6, a marker of  
46 inflammation, but this association was attenuated following adjustment for BMI, social class  
47 and physical activity ( $p = 0.05$ ). No significant association was seen between night-time  
48 sleep and von Willebrand factor (vWF), a marker of endothelial function, FEV1 (lung  
49 function) or cardiac markers (NT-proBNP and cTnT).  
50  
51  
52  
53  
54  
55  
56  
57  
58  
59  
60

### *Daytime sleep and cardiovascular risk markers*

In age-adjusted analysis, metabolic risk factors including HDL-C, triglycerides, HbA1c and insulin tended to increase with increasing hours of daytime sleep (Table 3). No association was seen with BP. The increasing trend was attenuated after adjustment for age, BMI, social class and physical activity. However compared to those who slept  $\leq 1$  hour, those with EDS ( $>1$  hour) showed significantly higher mean levels of HbA1c, glucose and insulin (Table 3). Mean levels of glucose and insulin remained significantly higher in those with EDS ( $p = 0.03$  and  $0.01$  respectively) even after further adjustment for prevalent diabetes and night-time sleep.

CRP increased with increasing daytime sleep duration, even after full adjustment ( $p$  trend =  $0.04$ ). Lung function decreased with increasing daytime sleep duration with levels markedly reduced in those with EDS compared to those reporting  $\leq 1$  hour daytime sleep ( $p < 0.0001$ ). Only EDS was associated with significantly higher mean vWF levels ( $p = 0.03$ ). When we examined the odds of having high vWF (top quintile) and low FEV1 (lowest quintile), those with EDS were 1.8 times more likely to have a high vWF [OR (95% CI) =  $1.82$  ( $1.17, 2.83$ )] and 2.4 times more likely to have a low FEV1 [OR (95% CI) =  $2.4$  ( $1.53, 3.74$ )] compared to those who reported no daytime sleep.

Mean levels of NT-pro BNP and cTnT (cardiac markers) were significantly higher only in those with EDS following full adjustment ( $p = 0.02$  and  $0.03$  respectively). This association remained significant even after adjustment for CKD. Men with EDS were more likely to have high (top quintile) mean NT-pro BNP [OR (95% CI) =  $1.69$  ( $1.06, 2.7$ )] and cTnT [OR (95% CI) =  $1.75$  ( $1.09, 2.8$ )] compared to those who reported no daytime sleep. However, this was attenuated following adjustment for prevalent diabetes, use of antihypertensive medication and depression [OR (95% CI) =  $1.59$  ( $0.99, 2.55$ )] and [OR (95% CI) =  $1.62$  ( $1.00, 2.62$ )] respectively, although it remained significant for cTnT. We further looked at men with a NT-pro BNP of  $\geq 400$ pg/ml, the diagnostic threshold for HF. Men who reported EDS had a higher

1  
2  
3 odds of having an NT-pro BNP of  $\geq 400$ pg/ml [OR (95% CI) = 1.88 (1.15, 3.1)]. This  
4 association remained following adjustment for prevalent diabetes, CKD, use of  
5 antihypertensive medication and depression [OR (95% CI) = 1.72 (1.03, 2.87)]. Exclusion of  
6 men using anxiolytic and hypnotic medications did not significantly alter this [OR (95% CI) =  
7 1.76 (1.05, 2.95)].  
8  
9  
10  
11  
12

### 13 14 15 16 *Sleep patterns and non-invasive markers of arterial disease*

17  
18 Table 4 shows the associations between sleeping patterns and non-invasive vascular  
19 measurements. There was a significant association between those sleeping less than 6  
20 hours and mean PWV and distensibility when compared to those sleeping 6-8.9 hours in the  
21 fully adjusted model ( $p = 0.04$  and  $0.03$  respectively). Men who slept less than 6 hours  
22 during the night-time were 1.6 times more likely to have a low (lowest quintile) mean  
23 distensibility compared to those who slept 6-8.9 hours in the fully adjusted model [OR (95%  
24 CI) = 1.56 (1.09, 2.23)]. There was no significant association between daytime sleep and  
25 markers of arterial stiffness. There was no association between sleeping patterns and CIMT  
26 in the study population.  
27  
28  
29  
30  
31  
32  
33  
34  
35  
36  
37  
38  
39  
40  
41  
42  
43  
44  
45  
46  
47  
48  
49  
50  
51  
52  
53  
54  
55  
56  
57  
58  
59  
60

## Discussion

We have confirmed previous reports of an association between night-time sleep duration (4) and daytime sleep duration (11, 12) with metabolic risk factors. Our findings extend previous studies by investigating the association between EDS and a wide range of cardiac markers and vascular measures not previously examined. Our study has shown that in a representative sample of British men aged 71–92 years with no prior history of heart attack or HF, those who sleep more than one hour during the day have a number of adverse characteristics including higher mean levels of cardiac markers, metabolic risk factors, inflammatory and endothelial markers and reduced lung function. These findings may point to pathways for the association observed between EDS and CVD and all-cause mortality. (8)

### *EDS and metabolic and cardiac risk markers*

EDS, defined in our study as daytime sleep of >1 hour, is associated with many adverse characteristics such as obesity, physical inactivity, diabetes, breathlessness, use of antihypertensive therapy and with an adverse pattern of metabolic risk factors including HbA1c, glucose and insulin. Our results confirm previous cross-sectional analyses which have shown EDS to be associated with the metabolic syndrome and longer habitual napping duration to be associated with an increased risk of impaired fasting glucose and diabetes mellitus. (11, 12) There was a significant linear relationship between increasing daytime sleep and mean CRP levels, with those reporting EDS having higher levels of mean CRP. This confirms results from a previous study which showed self-reported daytime napping is associated with higher levels of CRP in older British adults. (26) The association seen between daytime sleep and these markers of inflammation may provide an explanation for the excess all-cause mortality observed in those with daytime napping or EDS. (8, 9) Whilst both of these studies have adjusted for diabetes, neither has adjusted for inflammation.

We found a significant association between EDS and high levels of NT-pro BNP and cTnT, both of which are biomarkers of HF. (27, 28) NT-pro BNP is produced in response to cardiac

1  
2  
3 wall stress and is a strong predictor of HF. (22) Troponin T is a plasma marker of myocyte  
4 necrosis, which has been positively associated with incident CVD, HF and all-cause  
5 mortality. (29) Most notably men who reported EDS had a higher odds of having NT-pro  
6 BNP of  $\geq 400$ pg/ml (the diagnostic threshold for HF). As far as we are aware, this is the first  
7 study to look at the association between EDS and these cardiac markers.  
8  
9

10  
11  
12  
13 A strong association was also seen between EDS and elevated vWF (marker of endothelial  
14 dysfunction) and low FEV1, markers associated with HF. These findings suggest that EDS  
15 may be an early indicator of HF. This supports a recent report from our study when the men  
16 were aged 63-82 years which showed EDS to be associated with the risk of developing overt  
17 HF during 9 year follow-up. (7) In that analyses cardiac markers and lung function were not  
18 available.  
19  
20  
21  
22  
23  
24

25  
26 The association between EDS and HF may be explained by underlying respiratory illness  
27 such as obstructive sleep apnoea (OSA). Indeed within our cohort, EDS was significantly  
28 associated with obesity, self-reported breathlessness and reduced lung function. EDS may  
29 be a result of disturbed night-time sleep and difficulty falling asleep, both of which have been  
30 associated with HF. (30, 31) However, the associations we observed with cardiac markers  
31 and lung function were not seen in men with a short or long duration of night-time sleep and  
32 further analyses showed no association between these markers and those reporting difficulty  
33 falling asleep.  
34  
35  
36  
37  
38  
39  
40  
41  
42  
43  
44

#### 45 *Non-invasive markers of arterial disease*

46  
47  
48 In contrast to night-time sleep we did not observe any significant association between  
49 daytime sleep and markers of arterial stiffness. Short night-time sleep but not long night-time  
50 sleep was associated with arterial stiffness (PWV and carotid distensibility), when compared  
51 to those sleeping 6-8.9 hours. There was no association between sleeping patterns and  
52 CIMT in the study population. This is in contrast to previous studies which have shown an  
53  
54  
55  
56  
57  
58  
59  
60

1  
2  
3 association between short night-time sleep (17) and EDS (5) with CIMT. The differences  
4  
5 observed may be due to use of brachial-ankle PWV (13, 15), rather than carotid-femoral  
6  
7 PWV, different classification of long night-time sleep (13, 14) and a younger study  
8  
9 population. (15)  
10

### 11 12 13 14 *Strengths and limitations*

15  
16 The strengths of our study include the fact that it is a study of older men, a group who are at  
17  
18 high risk of vascular disease and the wide range of vascular parameters which we have  
19  
20 looked into. Limitations of our study include the lack of representation of women, middle  
21  
22 aged populations and ethnic minority groups which limits generalisability. Our data is based  
23  
24 on self-reported sleeping patterns at a single time point and it is possible that night-time and  
25  
26 daytime sleep duration have been misclassified. Our analysis of night-time sleep relies on  
27  
28 average duration of night-time sleep and we do not have measures of interruption or total  
29  
30 time spent in bed. As we do not have polysomnography data, we were unable to fully  
31  
32 exclude OSA as a contributing factor to our findings. Data regarding occupation was not  
33  
34 available and we were unable to assess if previous shift work, which has been reported to be  
35  
36 associated with cardiovascular and metabolic diseases, is related to the adverse  
37  
38 cardiovascular profile we noted in those with EDS. We appreciate that our results are based  
39  
40 on a cross-sectional analysis and therefore causality cannot be established and the direction  
41  
42 of the effect is unknown. It is also possible that there is an element of survival bias in our  
43  
44 data; it may be that men who attended the re-examination were healthier and this may  
45  
46 account for the null associations seen.  
47  
48  
49  
50

### 51 52 *Conclusions*

53  
54 EDS, defined as daytime sleep of more than one hour, is associated with an adverse  
55  
56 cardiovascular profile and may be an early indicator of HF. Clinically, this is important in the  
57  
58  
59  
60

1  
2  
3 assessment of older patients who seek medical advice for EDS, in whom indicators of HF  
4 should be sought and further investigations carried out if necessary.  
5  
6  
7  
8  
9

### 10 **Disclosures**

11  
12 The authors report no conflicts of interest.  
13  
14

### 17 **Funding**

18  
19 The British Regional Heart Study is a British Heart Foundation (BHF) research group. This  
20 work was supported by a British Heart Foundation programme grant (RG/13/16/30528) and  
21 project grant (PG/09/024, PG/13/41/30304).  
22  
23  
24  
25  
26  
27  
28

### 29 **Contributions**

30  
31 SGW initiated the concept and design of the paper. SZ analysed the data and drafted the  
32 manuscript. SGW, JPJH, EAE, PHW contributed to the interpretation of data. OP  
33 contributed to the analysis of the paper. EAE, JPJH, LL, PHW and SGW contributed to the  
34 acquisition of the data. All authors revised it critically for important intellectual content and  
35 approved the final version of the manuscript.  
36  
37  
38  
39  
40  
41  
42  
43  
44

### 45 **Data Sharing Statement**

46  
47 Further details of the Study can be found on [http://www.ucl.ac.uk/pcph/research-groups-](http://www.ucl.ac.uk/pcph/research-groups-themes/brhs-pub)  
48 [themes/brhs-pub](http://www.ucl.ac.uk/pcph/research-groups-themes/brhs-pub).  
49

50 For general data sharing enquiries, please contact Lucy Lennon ([l.lennon@ucl.ac.uk](mailto:l.lennon@ucl.ac.uk)).  
51  
52  
53  
54  
55  
56  
57  
58  
59  
60

Table 1 - Baseline characteristics of the study population

1  
2  
3  
4  
5  
6  
7  
8  
9  
10  
11  
12  
13  
14  
15  
16  
17  
18  
19  
20  
21  
22  
23  
24  
25  
26  
27  
28  
29  
30  
31  
32  
33  
34  
35  
36  
37  
38  
39  
40  
41  
42  
43  
44  
45  
46  
47  
48  
49

|                                            | Age mean<br>±std                  | Obese<br>(%) | Cigarette<br>Smoker<br>(%) | Inactive (%) | Manual<br>social<br>class (%) | Diabetic<br>(%) | Breathlessness<br>(%) | Using<br>Antihypertensives<br>(%) | Depression<br>(%) | CKD (%) |        |
|--------------------------------------------|-----------------------------------|--------------|----------------------------|--------------|-------------------------------|-----------------|-----------------------|-----------------------------------|-------------------|---------|--------|
| Night-time<br>Sleep<br>Duration<br>(hours) | < 6<br>(n = 213 <sup>a</sup> )    | 78.76±4.6    | 21.53                      | 0.94         | 48.36                         | 57.35           | 18.31                 | 40.72                             | 53.99             | 11.43   | 29     |
|                                            | 6-8.9<br>(n = 1126 <sup>a</sup> ) | 78.22±4.6    | 18.78                      | 3.83         | 33.66                         | 42.4            | 14.87                 | 19.32                             | 48.85             | 8.39    | 29.36  |
|                                            | ≥ 9<br>(n = 97 <sup>a</sup> )     | 79.24±4.9    | 22.11                      | 4.12         | 38.14                         | 48.45           | 19.79                 | 25                                | 52.58             | 11.34   | 38.71  |
|                                            | <b>p</b>                          | 0.05         | 0.52                       | 0.10         | 0.0002 *                      | 0.002 *         | 0.24                  | <.0001 *                          | 0.33              | 0.27    | 0.16   |
| Daytime<br>Sleep<br>Duration<br>(hours)    | 0<br>(n = 680 <sup>a</sup> )      | 77.83±4.4    | 16.1                       | 2.65         | 30.74                         | 46.1            | 12.24                 | 17.59                             | 45.88             | 7.41    | 26.42  |
|                                            | <1<br>(n = 290 <sup>a</sup> )     | 78.04±4.4    | 15.63                      | 2.76         | 33.45                         | 40              | 14.88                 | 21.61                             | 54.14             | 10.42   | 30.94  |
|                                            | 1<br>(n = 336 <sup>a</sup> )      | 78.79±4.7    | 24.17                      | 5.07         | 40.77                         | 44.61           | 20                    | 27.01                             | 49.7              | 8.98    | 32.81  |
|                                            | >1<br>(n = 130 <sup>a</sup> )     | 80.05±5      | 33.33                      | 4.62         | 58.46                         | 51.54           | 24.62                 | 41.46                             | 61.54             | 14.62   | 39.17  |
|                                            | <b>p</b>                          | <.0001 *     | <.0001 *                   | 0.18         | <.0001 *                      | 0.15            | 0.0003 *              | <.0001 *                          | 0.004 *           | 0.05    | 0.02 * |

a, maximum n in group, varies slightly with missing co-variate data

CKD, chronic kidney disease



Table 2 - Night-time sleep duration vs metabolic risk factors, inflammatory and endothelial markers, lung function and cardiac markers.

|                                                             |   | Night Sleep (hours)            |                                   |                               | P        |
|-------------------------------------------------------------|---|--------------------------------|-----------------------------------|-------------------------------|----------|
|                                                             |   | < 6<br>(n = 213 <sup>d</sup> ) | 6-8.9<br>(n = 1126 <sup>d</sup> ) | ≥ 9<br>(n = 97 <sup>d</sup> ) |          |
| <b>Metabolic risk factors [mean (95% CI)]</b>               |   |                                |                                   |                               |          |
| SBP (mmHg)                                                  | A | 146.04 (143.52, 148.56)        | 147.31 (146.21, 148.4)            | 150.73 (146.99, 154.47)       | 0.12     |
| DBP (mmHg)                                                  | A | 76.59 (75.07, 78.11)           | 77.46 (76.8, 78.12)               | 77.25 (74.99, 79.5)           | 0.59     |
| HDL-C (mmol/L)                                              | A | 1.47 (1.41, 1.53)              | 1.48 (1.45, 1.5)                  | 1.37 (1.28, 1.46)             | 0.07     |
| Triglycerides (mmol/L)                                      | A | 1.3 (1.21, 1.39)               | 1.28 (1.25, 1.32)                 | 1.39 (1.26, 1.52)             | 0.31     |
| HbA1c <sup>c</sup> (%)                                      | A | 5.93 (5.85, 6.02)              | 5.75 (5.72, 5.79)                 | 5.88 (5.76, 6)                | 0.0001 * |
|                                                             | B | 5.9 (5.82, 5.98)               | 5.76 (5.73, 5.79)                 | 5.86 (5.74, 5.97)             | 0.003 *  |
| Glucose <sup>c</sup> (mmol/L)                               | A | 5.78 (5.62, 5.94)              | 5.55 (5.48, 5.61)                 | 5.72 (5.49, 5.95)             | 0.02 *   |
|                                                             | B | 5.74 (5.58, 5.9)               | 5.56 (5.49, 5.62)                 | 5.68 (5.45, 5.91)             | 0.08     |
| Insulin <sup>c</sup> (mU/L)                                 | A | 8.26 (7.54, 9.04)              | 7.92 (7.62, 8.24)                 | 7.82 (6.84, 8.94)             | 0.69     |
| <b>Inflammatory and endothelial markers [mean (95% CI)]</b> |   |                                |                                   |                               |          |
| CRP <sup>c</sup> (mg/L)                                     | A | 1.51 (1.28, 1.78)              | 1.34 (1.25, 1.44)                 | 1.46 (1.15, 1.87)             | 0.37     |
| IL-6 <sup>c</sup> (pg/mL)                                   | A | 3.03 (2.74, 3.35)              | 2.98 (2.86, 3.11)                 | 3.72 (3.21, 4.3)              | 0.02 *   |
|                                                             | B | 2.94 (2.67, 3.25)              | 3 (2.87, 3.13)                    | 3.61 (3.12, 4.18)             | 0.05     |
| vWF (IU/dL)                                                 | A | 140.97 (130.97, 150.97)        | 133.27 (128.91, 137.63)           | 119.04 (104.2, 133.89)        | 0.06     |
| <b>Lung function [mean (95% CI)]</b>                        |   |                                |                                   |                               |          |
| FEV1 (L)                                                    | A | 2.43 (2.35, 2.5)               | 2.46 (2.42, 2.49)                 | 2.44 (2.32, 2.55)             | 0.76     |
| <b>Cardiac markers [mean (95% CI)]</b>                      |   |                                |                                   |                               |          |
| NT-pro BNP <sup>c</sup> (pg/mL)                             | A | 121.67 (101.33, 146.1)         | 126.45 (116.87, 136.81)           | 134.61 (102.8, 176.25)        | 0.83     |
| cTnT <sup>c</sup> (pg/ml)                                   | A | 11.25 (10.29, 12.3)            | 10.82 (10.41, 11.24)              | 10.14 (8.89, 11.57)           | 0.44     |

A, adjusted for age

B, adjusted for age, BMI, social class and physical activity

c, geometric mean

d, maximum n in group, varies slightly with missing co-variate data

SBP, systolic blood pressure; DBP, diastolic blood pressure; HDL-C, high density lipoprotein cholesterol; HbA1c, glycated haemoglobin; CRP, C-reactive protein; IL-6, interleukin 6; vWF, von Willebrand factor; FEV1, forced expiratory volume in 1s; NT-pro BNP, N-terminal pro brain natriuretic peptide; cTnT, cardiac troponin T

Table 3 – Daytime sleep duration vs metabolic risk factors, inflammatory and endothelial markers, lung function and cardiac markers.

|                                                             |   | Daytime Sleep Duration (Hours) |                               |                              |                               | p value trend | p value >1h vs others |
|-------------------------------------------------------------|---|--------------------------------|-------------------------------|------------------------------|-------------------------------|---------------|-----------------------|
|                                                             |   | 0<br>(n = 680 <sup>d</sup> )   | <1<br>(n = 290 <sup>d</sup> ) | 1<br>(n = 336 <sup>d</sup> ) | >1<br>(n = 130 <sup>d</sup> ) |               |                       |
| <b>Metabolic risk factors [mean (95% CI)]</b>               |   |                                |                               |                              |                               |               |                       |
| SBP (mmHg)                                                  | A | 147.46 (146.05, 148.88)        | 148.76 (146.59, 150.92)       | 147.14 (145.13, 149.15)      | 144.13 (140.88, 147.39)       | 0.90          | 0.04 *                |
|                                                             | B | 147.49 (146.07, 148.9)         | 148.59 (146.42, 150.75)       | 146.97 (144.95, 148.99)      | 144.78 (141.44, 148.11)       | 0.96          | 0.12                  |
| DBP (mmHg)                                                  | A | 77.41 (76.56, 78.26)           | 78.08 (76.77, 79.38)          | 77.16 (75.95, 78.37)         | 75.54 (73.57, 77.5)           | 0.98          | 0.06                  |
|                                                             | B | 77.56 (76.7, 78.41)            | 78.04 (76.74, 79.35)          | 76.94 (75.73, 78.16)         | 75.64 (73.63, 77.65)          | 0.74          | 0.09                  |
| HDL-C (mmol/L)                                              | A | 1.5 (1.47, 1.54)               | 1.47 (1.42, 1.52)             | 1.44 (1.39, 1.49)            | 1.33 (1.25, 1.41)             | 0.01 *        | 0.0002 *              |
|                                                             | B | 1.49 (1.46, 1.52)              | 1.46 (1.41, 1.5)              | 1.46 (1.42, 1.51)            | 1.41 (1.33, 1.48)             | 0.14          | 0.10                  |
| Triglycerides (mmol/L)                                      | A | 1.24 (1.19, 1.29)              | 1.3 (1.23, 1.38)              | 1.35 (1.28, 1.42)            | 1.42 (1.31, 1.54)             | 0.01 *        | 0.02 *                |
|                                                             | B | 1.26 (1.21, 1.3)               | 1.33 (1.26, 1.4)              | 1.33 (1.26, 1.4)             | 1.34 (1.22, 1.45)             | 0.03 *        | 0.47                  |
| HbA1c <sup>c</sup> (%)                                      | A | 5.73 (5.69, 5.78)              | 5.74 (5.68, 5.81)             | 5.87 (5.8, 5.93)             | 5.99 (5.88, 6.1)              | 0.01 *        | 0.0003 *              |
|                                                             | B | 5.75 (5.7, 5.79)               | 5.77 (5.7, 5.83)              | 5.84 (5.78, 5.91)            | 5.9 (5.79, 6.01)              | 0.04 *        | 0.04 *                |
| Glucose <sup>c</sup> (mmol/L)                               | A | 5.52 (5.43, 5.6)               | 5.48 (5.36, 5.61)             | 5.7 (5.58, 5.83)             | 5.98 (5.77, 6.2)              | 0.09          | 0.0002 *              |
|                                                             | B | 5.54 (5.45, 5.62)              | 5.51 (5.38, 5.63)             | 5.68 (5.56, 5.8)             | 5.86 (5.65, 6.07)             | 0.25          | 0.01 *                |
| Insulin <sup>c</sup> (mU/L)                                 | A | 7.5 (7.13, 7.88)               | 7.43 (6.89, 8.02)             | 8.69 (8.09, 9.33)            | 10.36 (9.21, 11.65)           | 0.01 *        | <.0001 *              |
|                                                             | B | 7.7 (7.36, 8.07)               | 7.68 (7.16, 8.24)             | 8.31 (7.77, 8.88)            | 9.29 (8.32, 10.37)            | 0.15          | 0.005 *               |
| <b>Inflammatory and endothelial markers [mean (95% CI)]</b> |   |                                |                               |                              |                               |               |                       |
| CRP <sup>c</sup> (mg/L)                                     | A | 1.24 (1.13, 1.36)              | 1.36 (1.19, 1.57)             | 1.56 (1.37, 1.78)            | 1.67 (1.35, 2.08)             | 0.01 *        | 0.07                  |
|                                                             | B | 1.27 (1.16, 1.39)              | 1.4 (1.22, 1.61)              | 1.5 (1.32, 1.71)             | 1.51 (1.21, 1.89)             | 0.04 *        | 0.37                  |
| IL-6 <sup>c</sup> (pg/mL)                                   | A | 2.88 (2.73, 3.05)              | 3.01 (2.76, 3.28)             | 3.19 (2.95, 3.45)            | 3.58 (3.14, 4.09)             | 0.03 *        | 0.01 *                |
|                                                             | B | 2.92 (2.76, 3.08)              | 3.06 (2.81, 3.33)             | 3.13 (2.89, 3.39)            | 3.34 (2.92, 3.81)             | 0.10          | 0.15                  |
| vWF (IU/dL)                                                 | A | 132.65 (127.06, 138.24)        | 127.34 (118.81, 135.87)       | 134.92 (126.85, 142.98)      | 148.03 (135.05, 161.01)       | 1.00          | 0.02 *                |
|                                                             | B | 132.76 (127.1, 138.41)         | 127.64 (119.03, 136.24)       | 134.88 (126.7, 143.07)       | 147.74 (134.39, 161.1)        | 0.96          | 0.03 *                |
| <b>Lung function [mean (95% CI)]</b>                        |   |                                |                               |                              |                               |               |                       |
| FEV1 (L)                                                    | A | 2.52 (2.48, 2.57)              | 2.46 (2.39, 2.52)             | 2.37 (2.31, 2.44)            | 2.21 (2.11, 2.31)             | <.0001 *      | <.0001 *              |
|                                                             | B | 2.52 (2.48, 2.56)              | 2.44 (2.38, 2.51)             | 2.38 (2.32, 2.44)            | 2.26 (2.15, 2.36)             | <.0001 *      | <.0001 *              |
| <b>Cardiac markers [mean (95% CI)]</b>                      |   |                                |                               |                              |                               |               |                       |
| NT-pro BNP <sup>c</sup> (pg/mL)                             | A | 122.31 (110.53, 135.34)        | 110.95 (95.15, 129.37)        | 135.15 (117.08, 156.02)      | 171.15 (134.5, 217.78)        | 0.70          | 0.01 *                |
|                                                             | B | 123.28 (111.4, 136.43)         | 111.2 (95.39, 129.62)         | 135.76 (117.52, 156.82)      | 167.33 (130.92, 213.88)       | 0.82          | 0.02 *                |
| cTnT <sup>c</sup> (pg/ml)                                   | A | 10.33 (9.83, 10.85)            | 10.45 (9.7, 11.27)            | 11.59 (10.8, 12.43)          | 12.79 (11.37, 14.38)          | 0.03 *        | 0.004 *               |
|                                                             | B | 10.41 (9.91, 10.93)            | 10.52 (9.77, 11.33)           | 11.31 (10.55, 12.13)         | 12.3 (10.93, 13.86)           | 0.12          | 0.03 *                |

1  
2  
3  
4  
5 A, adjusted for age

6 B, adjusted for age, BMI, social class and physical activity

7  
8 c, geometric mean

9  
10 d, maximum n in group, varies slightly with missing co-variate data

11 SBP, systolic blood pressure; DBP, diastolic blood pressure; HDL-C, high density lipoprotein cholesterol; HbA1c, glycated haemoglobin; CRP, C-reactive  
12 protein; IL-6, interleukin 6; vWF, von Willebrand factor; FEV1, forced expiratory volume in 1s; NT-pro BNP, N-terminal pro brain natriuretic peptide; cTnT,  
13 cardiac troponin T  
14  
15  
16  
17  
18  
19  
20  
21  
22  
23  
24  
25  
26  
27  
28  
29  
30  
31  
32  
33  
34  
35  
36  
37  
38  
39  
40  
41  
42  
43  
44  
45  
46  
47  
48  
49

Table 4 – Sleeping patterns vs non-invasive vascular measurements.

|                                            |                                | CIMT (mm)         |                             | PWV (m/s)            |                             | Distensibility ( $10^{-3}\text{kPa}^{-1}$ ) |                             |
|--------------------------------------------|--------------------------------|-------------------|-----------------------------|----------------------|-----------------------------|---------------------------------------------|-----------------------------|
|                                            |                                | Age-adjusted      | Additional Adj <sup>a</sup> | Age-adjusted         | Additional Adj <sup>a</sup> | Age-adjusted                                | Additional Adj <sup>a</sup> |
|                                            |                                | mean (95% CI)     | mean (95% CI)               | mean (95% CI)        | mean (95% CI)               | mean (95% CI)                               | mean (95% CI)               |
| Night-time<br>Sleep<br>Duration<br>(hours) | < 6 (n = 209 <sup>b</sup> )    | 0.81 (0.78, 0.83) | 0.8 (0.78, 0.82)            | 10.48 (10.24, 10.71) | 10.45 (10.22, 10.69)        | 11.66 (11.11, 12.21)                        | 11.62 (11.06, 12.18)        |
|                                            | 6-8.9 (n = 1125 <sup>b</sup> ) | 0.81 (0.8, 0.82)  | 0.81 (0.8, 0.82)            | 10.18 (10.08, 10.27) | 10.18 (10.08, 10.28)        | 12.29 (12.06, 12.53)                        | 12.31 (12.08, 12.55)        |
|                                            | ≥ 9 (n = 95 <sup>b</sup> )     | 0.82 (0.79, 0.85) | 0.82 (0.79, 0.85)           | 10.25 (9.91, 10.6)   | 10.25 (9.9, 10.59)          | 11.71 (10.9, 12.51)                         | 11.81 (11, 12.63)           |
|                                            | <b>p</b>                       | 0.67              | 0.64                        | 0.07                 | 0.11                        | 0.06                                        | 0.06                        |
| Daytime<br>Sleep<br>Duration<br>(hours)    | 0 (n = 677 <sup>b</sup> )      | 0.81 (0.79, 0.82) | 0.81 (0.8, 0.82)            | 10.25 (10.12, 10.38) | 10.25 (10.12, 10.38)        | 12.23 (11.93, 12.53)                        | 12.2 (11.89, 12.5)          |
|                                            | <1 (n = 290 <sup>b</sup> )     | 0.81 (0.79, 0.82) | 0.81 (0.79, 0.82)           | 10.15 (9.96, 10.35)  | 10.16 (9.96, 10.36)         | 12.49 (12.03, 12.96)                        | 12.5 (12.04, 12.97)         |
|                                            | 1 (n = 334 <sup>b</sup> )      | 0.8 (0.79, 0.82)  | 0.8 (0.78, 0.82)            | 10.2 (10.01, 10.38)  | 10.2 (10.01, 10.38)         | 11.81 (11.38, 12.25)                        | 11.88 (11.44, 12.32)        |
|                                            | >1 (n = 128 <sup>b</sup> )     | 0.84 (0.81, 0.87) | 0.83 (0.8, 0.86)            | 10.29 (9.99, 10.6)   | 10.29 (9.98, 10.6)          | 11.96 (11.25, 12.67)                        | 12.12 (11.39, 12.85)        |
| <b>p</b>                                   | 0.17                           | 0.37              | 0.80                        | 0.85                 | 0.18                        | 0.30                                        |                             |

a, adjusted for age, BMI, social class and physical activity

b, maximum n in group

CIMT, carotid intima-media thickness; PWV, pulse wave velocity

## Bibliography

1. Flamer HE. Sleep disorders in the elderly. *Australian and New Zealand Journal of Medicine*. 1996;26(1):96-104.
2. Grandner MA, Sands-Lincoln MR, Pak VM, Garland SN. Sleep duration, cardiovascular disease, and proinflammatory biomarkers. *Nature and science of sleep*. 2013;5:93-107.
3. Jackson CL, Redline S, Emmons KM. Sleep as a potential fundamental contributor to disparities in cardiovascular health. *Annual review of public health*. 2015;36:417-40.
4. Knutson KL. Sleep duration and cardiometabolic risk: a review of the epidemiologic evidence. *Best practice & research Clinical endocrinology & metabolism*. 2010;24(5):731-43.
5. Blachier M, Dauvilliers Y, Jaussent I, Helmer C, Ritchie K, Jouven X, et al. Excessive daytime sleepiness and vascular events: the Three City Study. *Annals of neurology*. 2012;71(5):661-7.
6. Newman AB, Spiekerman CF, Enright P, Lefkowitz D, Manolio T, Reynolds CF, et al. Daytime sleepiness predicts mortality and cardiovascular disease in older adults. The Cardiovascular Health Study Research Group. *Journal of the American Geriatrics Society*. 2000;48(2):115-23.
7. Wannamethee SG, Papacosta O, Lennon L, Whincup PH. Self-Reported Sleep Duration, Napping, and Incident Heart Failure: Prospective Associations in the British Regional Heart Study. *Journal of the American Geriatrics Society*. 2016.
8. Leng Y, Wainwright NW, Cappuccio FP, Surtees PG, Hayat S, Luben R, et al. Daytime napping and the risk of all-cause and cause-specific mortality: a 13-year follow-up of a British population. *American journal of epidemiology*. 2014;179(9):1115-24.
9. Tanabe N, Iso H, Seki N, Suzuki H, Yatsuya H, Toyoshima H, et al. Daytime napping and mortality, with a special reference to cardiovascular disease: the JACC study. *International journal of epidemiology*. 2010;39(1):233-43.
10. Zhong G, Wang Y, Tao T, Ying J, Zhao Y. Daytime napping and mortality from all causes, cardiovascular disease, and cancer: a meta-analysis of prospective cohort studies. *Sleep medicine*. 2015;16(7):811-9.
11. Hayley AC, Williams LJ, Kennedy GA, Berk M, Brennan SL, Pasco JA. Excessive daytime sleepiness and metabolic syndrome: a cross-sectional study. *Metabolism*. 2015;64(2):244-52.
12. Fang W, Li Z, Wu L, Cao Z, Liang Y, Yang H, et al. Longer habitual afternoon napping is associated with a higher risk for impaired fasting plasma glucose and diabetes mellitus in older adults: results from the Dongfeng–Tongji cohort of retired workers. *Sleep medicine*. 2013;14(10):950-4.
13. Tsai TC, Wu JS, Yang YC, Huang YH, Lu FH, Chang CJ. Long sleep duration associated with a higher risk of increased arterial stiffness in males. *Sleep*. 2014;37(8):1315-20.
14. Abe T, Aoki T, Yata S, Okada M. Sleep duration is significantly associated with carotid artery atherosclerosis incidence in a Japanese population. *Atherosclerosis*. 2011;217(2):509-13.
15. Yoshioka E, Saijo Y, Kita T, Okada E, Satoh H, Kawaharada M, et al. Relation between self-reported sleep duration and arterial stiffness: a cross-sectional study of middle-aged Japanese civil servants. *Sleep*. 2011;34(12):1681-6.
16. Wolff B, Volzke H, Schwahn C, Robinson D, Kessler C, John U. Relation of self-reported sleep duration with carotid intima-media thickness in a general population sample. *Atherosclerosis*. 2008;196(2):727-32.
17. Nakazaki C, Noda A, Koike Y, Yamada S, Murohara T, Ozaki N. Association of insomnia and short sleep duration with atherosclerosis risk in the elderly. *American journal of hypertension*. 2012;25(11):1149-55.
18. Lennon LT, Ramsay SE, Papacosta O, Shaper AG, Wannamethee SG, Whincup PH. Cohort Profile Update: The British Regional Heart Study 1978-2014: 35 years follow-up of cardiovascular disease and ageing. *International journal of epidemiology*. 2015;44(3):826-g.
19. Ramsay SE, Arianayagam DS, Whincup PH, Lennon LT, Cryer J, Papacosta AO, et al. Cardiovascular risk profile and frailty in a population-based study of older British men. *Heart*. 2015;101(8):616-22.

- 1
- 2
- 3 20. Wannamethee SG, Lowe GD, Whincup PH, Rumley A, Walker M, Lennon L. Physical activity
- 4 and hemostatic and inflammatory variables in elderly men. *Circulation*. 2002;105(15):1785-90.
- 5 21. Wannamethee SG, Whincup PH, Shaper AG, Rumley A, Lennon L, Lowe GDO. Circulating
- 6 inflammatory and hemostatic biomarkers are associated with risk of myocardial infarction and
- 7 coronary death, but not angina pectoris, in older men. *Journal of Thrombosis and Haemostasis*.
- 8 2009;7(10):1605-11.
- 9 22. Wannamethee GS, Welsh P, Whincup PH, Lennon L, Papacosta O, Sattar N. N-terminal pro
- 10 brain natriuretic peptide but not copeptin improves prediction of heart failure over other routine
- 11 clinical risk parameters in older men with and without cardiovascular disease: population-based
- 12 study. *European Journal of Heart Failure*. 2014;16(1):25-32.
- 13 23. National Institute for Clinical Excellence. Chronic heart failure: the management of adults
- 14 with chronic heart failure in primary and secondary care (partial update). (Clinical guideline 108)
- 15 2010 [Available from: <http://www.nice.org.uk/CG108>.
- 16 24. Levey AS, Stevens LA, Schmid CH, et al. A new equation to estimate glomerular filtration
- 17 rate. *Annals of Internal Medicine*. 2009;150(9):604-12.
- 18 25. Dijk JM, Algra A, van der Graaf Y, Grobbee DE, Bots ML. Carotid stiffness and the risk of new
- 19 vascular events in patients with manifest cardiovascular disease. *The SMART study*. *European heart*
- 20 *journal*. 2005;26(12):1213-20.
- 21 26. Leng Y, Ahmadi-Abhari S, Wainwright NWJ, Cappuccio FP, Surtees PG, Luben R, et al.
- 22 Daytime napping, sleep duration and serum C reactive protein: a population-based cohort study.
- 23 *BMJ Open*. 2014;4(11):e006071.
- 24 27. Kociol RD, Pang PS, Gheorghide M, Fonarow GC, O'Connor CM, Felker GM. Troponin
- 25 Elevation in Heart Failure Prevalence, Mechanisms, and Clinical Implications. *Journal of the American*
- 26 *College of Cardiology*. 2010;56(14):1071-8.
- 27 28. Kragelund C, Grønning B, Køber L, Hildebrandt P, Steffensen R. N-Terminal Pro-B-Type
- 28 Natriuretic Peptide and Long-Term Mortality in Stable Coronary Heart Disease. *New England Journal*
- 29 *of Medicine*. 2005;352(7):666-75.
- 30 29. Sato Y, Fujiwara H, Takatsu Y. Biochemical markers in heart failure. *Journal of cardiology*.
- 31 2012;59(1):1-7.
- 32 30. Laugsand LE, Strand LB, Platou C, Vatten LJ, Janszky I. Insomnia and the risk of incident heart
- 33 failure: a population study. *European heart journal*. 2014;35(21):1382-93.
- 34 31. Ingelsson E, Lind L, Ärnlöv J, Sundström J. Sleep disturbances independently predict heart
- 35 failure in overweight middle-aged men. *European Journal of Heart Failure*. 2007;9(2):184-90.
- 36
- 37
- 38
- 39
- 40
- 41
- 42
- 43
- 44
- 45
- 46
- 47
- 48
- 49
- 50
- 51
- 52
- 53
- 54
- 55
- 56
- 57
- 58
- 59
- 60

## STROBE Statement—checklist of items that should be included in reports of observational studies

|                              | Item No | Recommendation                                                                                                                                                                                                                                                                                                                                                                                                                                                                                                                                                                                                                                                                                                                |
|------------------------------|---------|-------------------------------------------------------------------------------------------------------------------------------------------------------------------------------------------------------------------------------------------------------------------------------------------------------------------------------------------------------------------------------------------------------------------------------------------------------------------------------------------------------------------------------------------------------------------------------------------------------------------------------------------------------------------------------------------------------------------------------|
| <b>Title and abstract</b>    | 1       | (a) Indicate the study's design with a commonly used term in the title or the abstract – <b>PAGE 1</b><br>(b) Provide in the abstract an informative and balanced summary of what was done and what was found – <b>PAGE 2</b>                                                                                                                                                                                                                                                                                                                                                                                                                                                                                                 |
| <b>Introduction</b>          |         |                                                                                                                                                                                                                                                                                                                                                                                                                                                                                                                                                                                                                                                                                                                               |
| Background/rationale         | 2       | Explain the scientific background and rationale for the investigation being reported – <b>PAGE 4</b>                                                                                                                                                                                                                                                                                                                                                                                                                                                                                                                                                                                                                          |
| Objectives                   | 3       | State specific objectives, including any prespecified hypotheses - <b>PAGE 4</b>                                                                                                                                                                                                                                                                                                                                                                                                                                                                                                                                                                                                                                              |
| <b>Methods</b>               |         |                                                                                                                                                                                                                                                                                                                                                                                                                                                                                                                                                                                                                                                                                                                               |
| Study design                 | 4       | Present key elements of study design early in the paper - <b>PAGE 5-7</b>                                                                                                                                                                                                                                                                                                                                                                                                                                                                                                                                                                                                                                                     |
| Setting                      | 5       | Describe the setting, locations, and relevant dates, including periods of recruitment, exposure, follow-up, and data collection - <b>PAGE 5-7</b>                                                                                                                                                                                                                                                                                                                                                                                                                                                                                                                                                                             |
| Participants                 | 6       | (a) <i>Cohort study</i> —Give the eligibility criteria, and the sources and methods of selection of participants. Describe methods of follow-up – <b>PAGE 5</b><br><i>Case-control study</i> —Give the eligibility criteria, and the sources and methods of case ascertainment and control selection. Give the rationale for the choice of cases and controls<br><i>Cross-sectional study</i> —Give the eligibility criteria, and the sources and methods of selection of participants<br>(b) <i>Cohort study</i> —For matched studies, give matching criteria and number of exposed and unexposed – <b>N/A</b><br><i>Case-control study</i> —For matched studies, give matching criteria and the number of controls per case |
| Variables                    | 7       | Clearly define all outcomes, exposures, predictors, potential confounders, and effect modifiers. Give diagnostic criteria, if applicable – <b>PAGE 5-7</b>                                                                                                                                                                                                                                                                                                                                                                                                                                                                                                                                                                    |
| Data sources/<br>measurement | 8*      | For each variable of interest, give sources of data and details of methods of assessment (measurement). Describe comparability of assessment methods if there is more than one group – <b>PAGE 5-7</b>                                                                                                                                                                                                                                                                                                                                                                                                                                                                                                                        |
| Bias                         | 9       | Describe any efforts to address potential sources of bias – <b>PAGE 13</b>                                                                                                                                                                                                                                                                                                                                                                                                                                                                                                                                                                                                                                                    |
| Study size                   | 10      | Explain how the study size was arrived at - <b>PAGE 5</b>                                                                                                                                                                                                                                                                                                                                                                                                                                                                                                                                                                                                                                                                     |
| Quantitative variables       | 11      | Explain how quantitative variables were handled in the analyses. If applicable, describe which groupings were chosen and why – <b>PAGE 5-7</b>                                                                                                                                                                                                                                                                                                                                                                                                                                                                                                                                                                                |
| Statistical methods          | 12      | (a) Describe all statistical methods, including those used to control for confounding - <b>PAGE 7</b><br>(b) Describe any methods used to examine subgroups and interactions – <b>PAGE 7</b><br>(c) Explain how missing data were addressed – <b>PAGE 5-6</b><br>(d) <i>Cohort study</i> —If applicable, explain how loss to follow-up was addressed – <b>N/A</b><br><i>Case-control study</i> —If applicable, explain how matching of cases and controls was addressed<br><i>Cross-sectional study</i> —If applicable, describe analytical methods taking account of sampling strategy<br>(e) Describe any sensitivity analyses – <b>N/A</b>                                                                                 |

Continued on next page

**Results**

|                  |     |                                                                                                                                                                                                                                                                                                                                                                                                                                                             |
|------------------|-----|-------------------------------------------------------------------------------------------------------------------------------------------------------------------------------------------------------------------------------------------------------------------------------------------------------------------------------------------------------------------------------------------------------------------------------------------------------------|
| Participants     | 13* | (a) Report numbers of individuals at each stage of study—eg numbers potentially eligible, examined for eligibility, confirmed eligible, included in the study, completing follow-up, and analysed – <b>PAGE 5-6</b><br>(b) Give reasons for non-participation at each stage – <b>PAGE 5</b><br>(c) Consider use of a flow diagram – <b>N/A</b>                                                                                                              |
| Descriptive data | 14* | (a) Give characteristics of study participants (eg demographic, clinical, social) and information on exposures and potential confounders – <b>PAGE 7-8, 15</b><br>(b) Indicate number of participants with missing data for each variable of interest – <b>PAGE 15-19</b><br>(c) <i>Cohort study</i> —Summarise follow-up time (eg, average and total amount) – <b>PAGE 5</b>                                                                               |
| Outcome data     | 15* | <i>Cohort study</i> —Report numbers of outcome events or summary measures over time – <b>PAGE 15-19</b><br><i>Case-control study</i> —Report numbers in each exposure category, or summary measures of exposure<br><i>Cross-sectional study</i> —Report numbers of outcome events or summary measures                                                                                                                                                       |
| Main results     | 16  | (a) Give unadjusted estimates and, if applicable, confounder-adjusted estimates and their precision (eg, 95% confidence interval). Make clear which confounders were adjusted for and why they were included – <b>PAGE 15-19</b><br>(b) Report category boundaries when continuous variables were categorized – <b>N/A</b><br>(c) If relevant, consider translating estimates of relative risk into absolute risk for a meaningful time period – <b>N/A</b> |
| Other analyses   | 17  | Report other analyses done—eg analyses of subgroups and interactions, and sensitivity analyses – <b>PAGE 9-10</b>                                                                                                                                                                                                                                                                                                                                           |

**Discussion**

|                  |    |                                                                                                                                                                                                |
|------------------|----|------------------------------------------------------------------------------------------------------------------------------------------------------------------------------------------------|
| Key results      | 18 | Summarise key results with reference to study objectives – <b>PAGE 7-10</b>                                                                                                                    |
| Limitations      | 19 | Discuss limitations of the study, taking into account sources of potential bias or imprecision. Discuss both direction and magnitude of any potential bias – <b>PAGE 13</b>                    |
| Interpretation   | 20 | Give a cautious overall interpretation of results considering objectives, limitations, multiplicity of analyses, results from similar studies, and other relevant evidence – <b>PAGE 11-13</b> |
| Generalisability | 21 | Discuss the generalisability (external validity) of the study results – <b>PAGE 13</b>                                                                                                         |

**Other information**

|         |    |                                                                                                                                                                                |
|---------|----|--------------------------------------------------------------------------------------------------------------------------------------------------------------------------------|
| Funding | 22 | Give the source of funding and the role of the funders for the present study and, if applicable, for the original study on which the present article is based – <b>PAGE 14</b> |
|---------|----|--------------------------------------------------------------------------------------------------------------------------------------------------------------------------------|

\*Give information separately for cases and controls in case-control studies and, if applicable, for exposed and unexposed groups in cohort and cross-sectional studies.

**Note:** An Explanation and Elaboration article discusses each checklist item and gives methodological background and published examples of transparent reporting. The STROBE checklist is best used in conjunction with this article (freely available on the Web sites of PLoS Medicine at <http://www.plosmedicine.org/>, Annals of Internal Medicine at <http://www.annals.org/>, and Epidemiology at <http://www.epidem.com/>). Information on the STROBE Initiative is available at [www.strobe-statement.org](http://www.strobe-statement.org).



# BMJ Open

## Self-reported sleep duration and napping, cardiac risk factors and markers of subclinical vascular disease: cross-sectional study in older men

|                                 |                                                                                                                                                                                                                                                                                                                                                                                                                                                                                                                             |
|---------------------------------|-----------------------------------------------------------------------------------------------------------------------------------------------------------------------------------------------------------------------------------------------------------------------------------------------------------------------------------------------------------------------------------------------------------------------------------------------------------------------------------------------------------------------------|
| Journal:                        | <i>BMJ Open</i>                                                                                                                                                                                                                                                                                                                                                                                                                                                                                                             |
| Manuscript ID                   | bmjopen-2017-016396.R2                                                                                                                                                                                                                                                                                                                                                                                                                                                                                                      |
| Article Type:                   | Research                                                                                                                                                                                                                                                                                                                                                                                                                                                                                                                    |
| Date Submitted by the Author:   | 10-May-2017                                                                                                                                                                                                                                                                                                                                                                                                                                                                                                                 |
| Complete List of Authors:       | Zonoozi, Shahrzad; UCL, Department of Primary Care & Population Health<br>Ramsay, Sheena; Newcastle University, Institute of Health & Society<br>Papacosta, Olia; University College London,<br>Lennon, Lucy; UCL, Department of Primary Care and Population Health<br>Ellins, Elizabeth; Swansea University, Institute of Life Sciences<br>Halcox, Julian; Swansea University, Department of Cardiology<br>Whincup, Peter; St George's University of London,<br>Wannamethee, Goya; UCL, Primary Care and Population Health |
| <b>Primary Subject Heading</b>: | Epidemiology                                                                                                                                                                                                                                                                                                                                                                                                                                                                                                                |
| Secondary Subject Heading:      | Cardiovascular medicine                                                                                                                                                                                                                                                                                                                                                                                                                                                                                                     |
| Keywords:                       | Sleep patterns, Cardiac function, Subclinical atherosclerosis                                                                                                                                                                                                                                                                                                                                                                                                                                                               |
|                                 |                                                                                                                                                                                                                                                                                                                                                                                                                                                                                                                             |

SCHOLARONE™  
Manuscripts

Only

1  
2  
3 **Self-reported sleep duration and napping, cardiac risk factors and markers of**  
4 **subclinical vascular disease: cross-sectional study in older men**  
5  
6

7  
8 Shahrzad Zonoozi<sup>1</sup>; Sheena E Ramsay<sup>2</sup>; Olia Papacosta<sup>1</sup>; Lucy Lennon<sup>1</sup>; Elizabeth A Ellins<sup>3</sup>;  
9  
10 Julian P J Halcox<sup>3</sup>; Peter H Whincup<sup>4</sup>; S Goya Wannamethee<sup>1</sup>  
11

12  
13 <sup>1</sup> UCL Department of Primary Care & Population Health, UCL Medical School, Rowland Hill  
14 Street, London, NW3 2PF, UK  
15

16  
17  
18 <sup>2</sup> Institute of Health & Society, Newcastle University, Richardson Road, Newcastle upon  
19 Tyne, NE2 4AX, UK  
20

21  
22  
23 <sup>3</sup> Institute of Life Sciences, Swansea University, Singleton Park, Swansea, SA2 8PP, UK  
24

25  
26 <sup>4</sup> Population Health Research Institute, St George's University of London, Cranmer Terrace,  
27 London, SW17 0RE, UK  
28  
29  
30  
31  
32

33 **Corresponding author:**  
34

35  
36 Shahrzad Zonoozi, UCL Department of Primary Care & Population Health, UCL Medical  
37 School, Rowland Hill Street, London, NW3 2PF, UK. Email: shahrzadz@gmail.com  
38  
39

40  
41 Word count: 3595; 4 tables  
42  
43  
44  
45

46  
47 Keywords: sleep patterns, cardiac function, subclinical atherosclerosis  
48  
49  
50  
51  
52  
53  
54  
55  
56  
57  
58  
59  
60

## Abstract

**Study Objectives:** Daytime sleep has been associated with increased risk of cardiovascular disease and heart failure (HF) but the mechanisms remain unclear. We have investigated the association between daytime and night-time sleep patterns and cardiovascular risk markers in older adults including cardiac markers and subclinical markers of atherosclerosis [arterial stiffness and carotid intima-media thickness (CIMT)].

**Methods:** Cross sectional study of 1722 surviving men aged 71-92 examined in 2010-2012 across 24 British towns, from a prospective study initiated in 1978-1980. Participants completed a questionnaire and were invited for a physical examination. Men with a history of heart attack or HF (n = 251) were excluded from the analysis.

**Results:** Self-reported daytime sleep duration was associated with higher fasting glucose and insulin levels (p = 0.02 and 0.01 respectively) even after adjustment for age, BMI, physical activity and social class. Compared to those with no daytime sleep, men with daytime sleep >1 hour, defined as excessive daytime sleepiness (EDS), had a higher risk of raised N-terminal pro brain natriuretic peptide (NT-pro BNP) of  $\geq 400$ pg/ml, the diagnostic threshold for HF [OR (95% CI) = 1.88 (1.15, 3.1)], higher mean troponin (cTnT), reduced lung function (forced expiratory volume in 1s) and elevated von Willebrand factor (vWF), a marker of endothelial dysfunction. However, EDS was unrelated to CIMT and arterial stiffness. By contrast night-time sleep was only associated with HbA1c (short or long sleep) and arterial stiffness (short sleep).

**Conclusions:** Daytime sleep duration of >1 hour may be an early indicator of HF.

Word count: 248

## Article Summary

### Strength and limitations of this study

- To the best of our knowledge, this is the first study to look at the association between excessive daytime sleepiness (EDS), cardiac markers and vascular parameters.
- Owing to a lack of data, we do not know if the associations seen are true for women, middle aged populations and ethnic minorities.
- As we do not have polysomnography data, we were unable to fully exclude obstructive sleep apnoea as a contributing factor to our findings.
- Our results are based on a cross-sectional analysis and therefore causality cannot be established.

## Introduction

Sleep disturbance is a common complaint, especially amongst older adults. (1) It is increasingly recognised that there is a U shaped association between sleep duration and risk of cardiovascular disease (CVD) and metabolic disturbances – i.e. both short and long sleep durations are associated with an increased risk. (2-4) More recently, studies have shown excessive daytime sleepiness (EDS), one of the more common sleep disturbances reported in the older population, to be associated with increased risks of CVD (5, 6), heart failure (HF) (6, 7) and all-cause mortality. (8-10)

The mechanism of the association between EDS and CVD risk remains unclear. Whilst some studies have looked at the association between EDS and metabolic risk markers (11, 12), few have examined mechanisms by which EDS may influence CVD and in particular incident HF. (6) In particular, the association between EDS and markers of arterial disease and surrogate markers of cardiac function, including NT-pro brain natriuretic peptide (BNP), a marker of ventricular stress, and cardiac troponin T (cTnT), a marker of myocardial injury, have been less studied. Sub-clinical arterial disease markers are increasingly being used as early predictors for atherosclerosis and CVD. A number of non-invasive assessments have been developed, including measures of atherosclerosis such as carotid intima-media thickness (CIMT) and indirect measures of arterial stiffness including carotid distensibility and pulse wave velocity (PWV). Although a number of studies have examined the association between night-time sleep duration and arterial stiffness, (13-17) studies on the association between EDS and vascular risk markers are limited. (5) We have therefore examined the association between daytime sleep as well as night-time sleep with vascular risk factors including metabolic risk factors, inflammatory and endothelial markers, cardiac markers and measures of sub-clinical arterial disease (including arterial stiffness and CIMT).

## Methods

The British Regional Heart Study is a prospective study which recruited a socioeconomically and geographically representative cohort of 7735 men from 24 British towns between 1978 and 1980. The present investigation is based on a reassessment in 2010-2012, when all surviving men (n = 3137), aged between 71–92 years, were sent a postal questionnaire and invited for a 30<sup>th</sup> year re-examination. 2137 (68%) men completed the postal questionnaire and 1722 (55%) men attended the re-examination. (18) Blood samples were collected after fasting for a minimum of six hours and were stored at -70°C. Ethical approval for data collection was obtained from the relevant research ethics committee. The men were asked if a doctor had ever told them they had a heart attack or HF and these men were excluded from the analysis (n = 251). Of the men with no history of heart attack or HF, 1471 men had physical, blood and ultrasound measurements carried out. This present study is a cross-sectional analysis of the data from the 2010-2012 questionnaires and re-examination.

*CVD risk factors:* Physical examination included blood pressure (BP), lung function as well as height and weight, from which body mass index (BMI) was calculated. (19) Height standardised forced expiratory volume in 1 second (FEV1) was measured using the Vitalograph Compact II. Details of measurement and classification for smoking status and physical activity in this cohort have been previously described. (20) Details of the men's medication history, including use of antihypertensive, hypnotic and anxiolytic medication, were recorded at the examination and participants were also asked to report symptoms of breathlessness. Measurements of metabolic, inflammatory and endothelial markers were taken as described previously. (19, 21, 22) NT-pro BNP and cTnT were measured using the Elecsys 2010 electrochemiluminescence method (Roche Diagnostics, Burgess Hill, UK). The lowest detectable value of cTnT was 5 and for anyone with a recorded reading of < 5, we used half of the lowest detectable value (i.e. 2.5). NT-pro BNP ≥400pg/ml was defined as high, as per current guidelines issued by the National Institute of Clinical Excellence (NICE)

1  
2  
3 for the diagnosis of HF. (23) Prevalent diabetes included men with doctor-diagnosed  
4 diabetes and men with fasting blood glucose  $\geq 7$  mmol/L. 1402 men had at least one blood  
5 measurement (69 missing). Chronic kidney disease (CKD) was defined as estimated  
6 glomerular filtration rate of less than 60 using the CKD Epidemiology Collaboration (CKD-  
7 EPI) creatinine equation. (24)  
8  
9  
10  
11

12  
13 *Sleep parameters:* Reported duration of night sleep was based on response to: "On average,  
14 how many hours of sleep do you have each night?" Duration of day sleep was based on  
15 response to "On average, how much sleep (if any) do you have during the daytime?" If a  
16 response was entered for the night sleep question but no response was indicated for the day  
17 sleep question, the answer was set to 0. 1436 men completed the questions on night-time  
18 and daytime sleep duration (35 missing). Night-time sleep was categorised into three  
19 groups:  $< 6$ , 6-8.9 and  $\geq 9$  hours. Daytime sleep was categorised into four groups: 0 hours,  $< 1$   
20 hour, 1 hour and  $> 1$  hour. Those sleeping  $> 1$  hour during the daytime were defined as  
21 having EDS.  
22  
23  
24  
25  
26  
27  
28  
29  
30  
31

32 *Non-invasive markers of arterial disease:* Measurements were measured by two vascular  
33 technicians in series. Left and right carotid arteries were imaged using a Z.One Ultra  
34 ultrasound system (Zonare Medical Systems, Mountain View, CA) with a 5-10-mHz linear  
35 probe. A cross sectional sweep from the base of the common carotid artery to the jaw bone  
36 and longitudinal images of the common carotid artery approximately 1cm proximal to the  
37 carotid bifurcation were recorded. Peak systolic and end-diastolic common carotid artery  
38 diameter and CIMT, the distance between the leading edge of the intima and the media-  
39 adventitia interface, were measured using Carotid Analyser software (Medical Imaging  
40 Applications, Iowa City, IA). From the longitudinal images, a region of interest (5-10 mm)  
41 was selected in a plaque free area, at least 1cm from the bifurcation.  
42  
43  
44  
45  
46  
47  
48  
49  
50  
51

52  
53 CIMT was measured from three end-diastolic images on each side and a mean of these  
54 measures was calculated. Maximum and minimum carotid artery diameter was assessed  
55 from three consecutive waveforms and mean distension was calculated as: maximum  
56  
57  
58  
59  
60

1  
2  
3 diameter – minimum diameter. The distensibility coefficient was then calculated as described  
4  
5 by Dijk *et al.*: distensibility coefficient = [(2 x mean distension/baseline diameter)/mean pulse  
6  
7 pressure (kPa)]\*1000. (25) Carotid to femoral PWV was assessed using a Vicorder  
8  
9 (Skidmore Medical, Bristol UK), with participants in a semi-supine position with their torso at  
10  
11 approximately 30°. A 2x9cm cuff was positioned around the neck with the bladder over the  
12  
13 right carotid pulse, and a Hokanson SC10 cuff around the middle of the right thigh. Path  
14  
15 length was measured from the sternal notch to the centre of the thigh cuff. The cuffs were  
16  
17 simultaneously inflated and traces with a minimum of 3 good quality waveforms recorded.  
18  
19 Two PWV measurements, within  $\leq 0.5$ m/s of each other, were accepted and averaged. 1464  
20  
21 men had at least one non-invasive vascular measurement carried out (7 missing).  
22

23  
24 *Statistical analysis:* Distributions of HbA1c, glucose, insulin, CRP, IL-6, NT-pro BNP and  
25  
26 cTnT were highly skewed and log transformation was used. Comparisons of baseline  
27  
28 characteristics between the sleep groups were carried out using the chi squared test for  
29  
30 categorical variables and analysis of variance for continuous variables. Logistic regression  
31  
32 models were used to assess the differences in outcomes between categorical groups. In  
33  
34 multivariate analyses, age, BMI, physical activity and social class were fitted as continuous  
35  
36 variables whilst prevalent diabetes and use of antihypertensive medications was defined as  
37  
38 categorical variables. The base groups for the statistical analysis were the group sleeping 6-  
39  
40 8.9 hours in the night-time sleep group. A threshold effect was seen in those sleeping >1  
41  
42 hour in the daytime and therefore we compared those sleeping >1 hour with those sleeping  
43  
44  $\leq 1$ . We also carried out statistical analysis of the trend in the daytime sleep group. All  
45  
46 analyses were performed using SAS version 9.3 (SAS, Cary, North Carolina).  
47  
48  
49  
50

## 51 **Results**

52  
53 The average duration of night-time sleep in the men who responded was 6.8 hours ( $\pm 1.4$   
54  
55 hours). 15% of the men reported night-time sleep duration of less than 6 hours, while 7%  
56  
57 reported sleeping  $\geq 9$  hours during the night. 47% of men reported no daytime sleep whilst  
58  
59  
60



1  
2  
3 9% reported EDS. Night-time sleep duration was significantly associated with EDS ( $p = 0.02$ ;  
4 correlation coefficient  $r = -0.063$ ), with a smaller proportion of those sleeping  $\geq 9$  hours  
5 reporting EDS. Daytime sleep duration was significantly associated with night-time sleep of  
6 less than 6 hours ( $p = 0.02$ ).  
7  
8  
9  
10

### 11 12 13 14 *Baseline characteristics*

15  
16 Table 1 describes the baseline characteristics of the study population according to night-time  
17 and daytime sleep patterns. A U-shaped relationship was seen between night-time sleep  
18 and CVD risk factors. Both short and long night-time sleep were associated with increased  
19 age, increased prevalence of physical inactivity, manual workers and breathlessness  
20 compared to those with 6-8.9 hours sleep. There was a significant association between  
21 night-time sleep and use of hypnotic or anxiolytic medications. Daytime sleep is strongly  
22 associated with older age and with many adverse characteristics including physical inactivity,  
23 obesity, prevalent diabetes, breathlessness, use of anti-hypertensive medication, depression  
24 and CKD. The prevalence of these adverse factors tended to increase with increasing  
25 duration of daytime sleep. Daytime sleep was not associated with use of hypnotic or  
26 anxiolytic medications.  
27  
28  
29  
30  
31  
32  
33  
34  
35  
36  
37  
38  
39  
40  
41

### 42 *Night-time sleep and cardiovascular risk markers*

43  
44 There was a U-shaped association between night-time sleep and metabolic risk factors  
45 including HbA1c and glucose (Table 2). The association between night-time sleep and  
46 HbA1c remained significant following adjustment for daytime sleep ( $p = 0.04$ ). In age-  
47 adjusted analysis, night-time sleep was significantly associated with IL-6, a marker of  
48 inflammation, but this association was attenuated following adjustment for BMI, social class  
49 and physical activity ( $p = 0.05$ ). No significant association was seen between night-time  
50  
51  
52  
53  
54  
55  
56  
57  
58  
59  
60

1  
2  
3 sleep and von Willebrand factor (vWF), a marker of endothelial function, FEV1 (lung  
4 function) or cardiac markers (NT-proBNP and cTnT).  
5  
6  
7  
8  
9

#### 10 *Daytime sleep and cardiovascular risk markers*

11  
12 In age-adjusted analysis, metabolic risk factors including HDL-C, triglycerides, HbA1c and  
13 insulin tended to increase with increasing hours of daytime sleep (Table 3). No association  
14 was seen with BP. The increasing trend was attenuated after adjustment for age, BMI, social  
15 class and physical activity. However compared to those who slept  $\leq 1$  hour, those with EDS  
16 ( $>1$  hour) showed significantly higher mean levels of HbA1c, glucose and insulin (Table 3).  
17 Mean levels of glucose and insulin remained significantly higher in those with EDS ( $p = 0.03$   
18 and  $0.01$  respectively) even after adjustment for prevalent diabetes and night-time  
19 sleep.  
20  
21  
22  
23  
24  
25  
26  
27

28  
29 CRP increased with increasing daytime sleep duration, even after full adjustment ( $p$  trend =  
30  $0.04$ ). Lung function decreased with increasing daytime sleep duration with levels markedly  
31 reduced in those with EDS compared to those reporting  $\leq 1$  hour daytime sleep ( $p < 0.0001$ ).  
32  
33 Only EDS was associated with significantly higher mean vWF levels ( $p = 0.03$ ). When we  
34 examined the odds of having high vWF (top quintile) and low FEV1 (lowest quintile), those  
35 with EDS were 1.8 times more likely to have a high vWF [OR (95% CI) = 1.82 (1.17, 2.83)]  
36 and 2.4 times more likely to have a low FEV1 [OR (95% CI) = 2.4 (1.53, 3.74)] compared to  
37 those who reported no daytime sleep.  
38  
39  
40  
41  
42  
43  
44

45  
46 Mean levels of NT-pro BNP and cTnT (cardiac markers) were significantly higher only in  
47 those with EDS following full adjustment ( $p = 0.02$  and  $0.03$  respectively). This association  
48 remained significant even after adjustment for CKD. Men with EDS were more likely to have  
49 high (top quintile) mean NT-pro BNP [OR (95% CI) = 1.69 (1.06, 2.7)] and cTnT [OR (95%  
50 CI) = 1.75 (1.09, 2.8)] compared to those who reported no daytime sleep. However, this was  
51 attenuated following adjustment for prevalent diabetes, use of antihypertensive medication  
52 and depression [OR (95% CI) = 1.59 (0.99, 2.55)] and [OR (95% CI) = 1.62 (1.00, 2.62)]  
53  
54  
55  
56  
57  
58  
59  
60

1  
2  
3 respectively, although it remained significant for cTnT. We further looked at men with a NT-  
4 pro BNP of  $\geq 400$ pg/ml, the diagnostic threshold for HF. Men who reported EDS had a higher  
5 odds of having an NT-pro BNP of  $\geq 400$ pg/ml [OR (95% CI) = 1.88 (1.15, 3.1)]. This  
6 association remained following adjustment for prevalent diabetes, CKD, use of  
7 antihypertensive medication and depression [OR (95% CI) = 1.72 (1.03, 2.87)]. Exclusion of  
8 men using anxiolytic and hypnotic medications did not significantly alter this [OR (95% CI) =  
9 1.76 (1.05, 2.95)].  
10  
11  
12  
13  
14  
15  
16  
17  
18  
19

### 20 *Sleep patterns and non-invasive markers of arterial disease*

21  
22 Table 4 shows the associations between sleeping patterns and non-invasive vascular  
23 measurements. There was a significant association between those sleeping less than 6  
24 hours and mean PWV and distensibility when compared to those sleeping 6-8.9 hours in the  
25 fully adjusted model ( $p = 0.04$  and  $0.03$  respectively). Men who slept less than 6 hours  
26 during the night-time were 1.6 times more likely to have a low (lowest quintile) mean  
27 distensibility compared to those who slept 6-8.9 hours in the fully adjusted model [OR (95%  
28 CI) = 1.56 (1.09, 2.23)]. There was no significant association between daytime sleep and  
29 markers of arterial stiffness. There was no association between sleeping patterns and CIMT  
30 in the study population.  
31  
32  
33  
34  
35  
36  
37  
38  
39  
40  
41  
42  
43  
44  
45  
46  
47  
48  
49  
50  
51  
52  
53  
54  
55  
56  
57  
58  
59  
60

## Discussion

We have confirmed previous reports of an association between night-time sleep duration (4) and daytime sleep duration (11, 12) with metabolic risk factors. Our findings extend previous studies by investigating the association between EDS and a wide range of cardiac markers and vascular measures not previously examined. Our study has shown that in a representative sample of British men aged 71–92 years with no prior history of heart attack or HF, those who sleep more than one hour during the day have a number of adverse characteristics including higher mean levels of cardiac markers, metabolic risk factors, inflammatory and endothelial markers and reduced lung function. These findings may point to pathways for the association observed between EDS and CVD and all-cause mortality. (8)

### *EDS and metabolic and cardiac risk markers*

EDS, defined in our study as daytime sleep of >1 hour, is associated with many adverse characteristics such as obesity, physical inactivity, diabetes, breathlessness, use of antihypertensive therapy and with an adverse pattern of metabolic risk factors including HbA1c, glucose and insulin. Our results confirm previous cross-sectional analyses which have shown EDS to be associated with the metabolic syndrome and longer habitual napping duration to be associated with an increased risk of impaired fasting glucose and diabetes mellitus. (11, 12) There was a significant linear relationship between increasing daytime sleep and mean CRP levels, with those reporting EDS having higher levels of mean CRP. This confirms results from a previous study which showed self-reported daytime napping is associated with higher levels of CRP in older British adults. (26) The association seen between daytime sleep and these markers of inflammation may provide an explanation for the excess all-cause mortality observed in those with daytime napping or EDS. (8, 9) Whilst both of these studies have adjusted for diabetes, neither has adjusted for inflammation.

We found a significant association between EDS and high levels of NT-pro BNP and cTnT, both of which are biomarkers of HF. (27, 28) NT-pro BNP is produced in response to cardiac

1  
2  
3 wall stress and is a strong predictor of HF. (22) Troponin T is a plasma marker of myocyte  
4 necrosis, which has been positively associated with incident CVD, HF and all-cause  
5 mortality. (29) Most notably men who reported EDS had a higher odds of having NT-pro  
6 BNP of  $\geq 400$ pg/ml (the diagnostic threshold for HF). As far as we are aware, this is the first  
7 study to look at the association between EDS and these cardiac markers.  
8  
9

10  
11  
12  
13 A strong association was also seen between EDS and elevated vWF (marker of endothelial  
14 dysfunction) and low FEV1, markers associated with HF. These findings suggest that EDS  
15 may be an early indicator of HF. This supports a recent report from our study when the men  
16 were aged 63-82 years which showed EDS to be associated with the risk of developing overt  
17 HF during 9 year follow-up. (7) In that analyses cardiac markers and lung function were not  
18 available.  
19  
20  
21  
22  
23  
24

25  
26 The association between EDS and HF may be explained by underlying respiratory illness  
27 such as obstructive sleep apnoea (OSA). Indeed within our cohort, EDS was significantly  
28 associated with obesity, self-reported breathlessness and reduced lung function. EDS may  
29 be a result of disturbed night-time sleep and difficulty falling asleep, both of which have been  
30 associated with HF. (30, 31) However, the associations we observed with cardiac markers  
31 and lung function were not seen in men with a short or long duration of night-time sleep and  
32 further analyses showed no association between these markers and those reporting difficulty  
33 falling asleep.  
34  
35  
36  
37  
38  
39  
40  
41  
42  
43  
44

#### 45 *Non-invasive markers of arterial disease*

46  
47  
48 In contrast to night-time sleep we did not observe any significant association between  
49 daytime sleep and markers of arterial stiffness. Short night-time sleep but not long night-time  
50 sleep was associated with arterial stiffness (PWV and carotid distensibility), when compared  
51 to those sleeping 6-8.9 hours. There was no association between sleeping patterns and  
52 CIMT in the study population. This is in contrast to previous studies which have shown an  
53  
54  
55  
56  
57  
58  
59  
60

1  
2  
3 association between short night-time sleep (17) and EDS (5) with CIMT. The differences  
4 observed may be due to use of brachial-ankle PWV (13, 15), rather than carotid-femoral  
5 PWV, different classification of long night-time sleep (13, 14) and a younger study  
6 population. (15)  
7  
8  
9

### 10 11 12 13 14 *Strengths and limitations*

15  
16 The strengths of our study include the fact that it is a study of older men, a group who are at  
17 high risk of vascular disease and the wide range of vascular parameters which we have  
18 looked into. Limitations of our study include the lack of representation of women, middle  
19 aged populations and ethnic minority groups which limits generalisability. Our data is based  
20 on self-reported sleeping patterns at a single time point and it is possible that night-time and  
21 daytime sleep duration have been misclassified. Our analysis of night-time sleep relies on  
22 average duration of night-time sleep and we do not have measures of interruption or total  
23 time spent in bed. As we do not have polysomnography data, we were unable to fully  
24 exclude OSA as a contributing factor to our findings. Data regarding occupation was not  
25 available and we were unable to assess if previous shift work, which has been reported to be  
26 associated with cardiovascular and metabolic diseases, is related to the adverse  
27 cardiovascular profile we noted in those with EDS. We appreciate that our results are based  
28 on a cross-sectional analysis and therefore causality cannot be established and the direction  
29 of the effect is unknown. It is also possible that there is an element of survival bias in our  
30 data; it may be that men who attended the re-examination were healthier and this may  
31 account for the null associations seen.  
32  
33  
34  
35  
36  
37  
38  
39  
40  
41  
42  
43  
44  
45  
46  
47  
48

### 49 50 51 52 *Conclusions*

53  
54 EDS, defined as daytime sleep of more than one hour, is associated with an adverse  
55 cardiovascular profile and may be an early indicator of HF. Clinically, this is important in the  
56  
57  
58  
59  
60

1  
2  
3 assessment of older patients who seek medical advice for EDS, in whom indicators of HF  
4 should be sought and further investigations carried out if necessary.  
5  
6  
7  
8  
9

### 10 **Disclosures**

11  
12 The authors report no conflicts of interest.  
13  
14

### 17 **Funding**

18  
19 The British Regional Heart Study is a British Heart Foundation (BHF) research group. This  
20 work was supported by a British Heart Foundation programme grant (RG/13/16/30528) and  
21 project grant (PG/09/024, PG/13/41/30304).  
22  
23  
24  
25  
26  
27  
28

### 29 **Contributions**

30  
31 SGW initiated the concept and design of the paper. SZ analysed the data and drafted the  
32 manuscript. SGW, JPJH, EAE, PHW contributed to the interpretation of data. OP  
33 contributed to the analysis of the paper. EAE, JPJH, LL, PHW and SGW contributed to the  
34 acquisition of the data. All authors revised it critically for important intellectual content and  
35 approved the final version of the manuscript.  
36  
37  
38  
39  
40  
41  
42  
43  
44

### 45 **Data Sharing Statement**

46  
47 Further details of the Study can be found on [http://www.ucl.ac.uk/pcph/research-groups-](http://www.ucl.ac.uk/pcph/research-groups-themes/brhs-pub)  
48 [themes/brhs-pub](http://www.ucl.ac.uk/pcph/research-groups-themes/brhs-pub).  
49

50 For general data sharing enquiries, please contact Lucy Lennon ([l.lennon@ucl.ac.uk](mailto:l.lennon@ucl.ac.uk)).  
51  
52  
53  
54  
55  
56  
57  
58  
59  
60

1  
2  
3  
4  
5  
6  
7  
8  
9  
10  
11  
12  
13  
14  
15  
16  
17  
18  
19  
20  
21  
22  
23  
24  
25  
26  
27  
28  
29  
30  
31  
32  
33  
34  
35  
36  
37  
38  
39  
40  
41  
42  
43  
44  
45  
46  
47  
48  
49

Table 1 - Baseline characteristics of the study population

|                                            | Age mean<br>±std                  | Obese<br>(%) | Cigarette<br>Smoker<br>(%) | Inactive (%) | Manual<br>social<br>class (%) | Diabetic<br>(%) | Breathlessness<br>(%) | Using<br>Antihypertensives<br>(%) | Depression<br>(%) | CKD (%) |        |
|--------------------------------------------|-----------------------------------|--------------|----------------------------|--------------|-------------------------------|-----------------|-----------------------|-----------------------------------|-------------------|---------|--------|
| Night-time<br>Sleep<br>Duration<br>(hours) | < 6<br>(n = 213 <sup>a</sup> )    | 78.76±4.6    | 21.53                      | 0.94         | 48.36                         | 57.35           | 18.31                 | 40.72                             | 53.99             | 11.43   | 29     |
|                                            | 6-8.9<br>(n = 1126 <sup>a</sup> ) | 78.22±4.6    | 18.78                      | 3.83         | 33.66                         | 42.4            | 14.87                 | 19.32                             | 48.85             | 8.39    | 29.36  |
|                                            | ≥ 9<br>(n = 97 <sup>a</sup> )     | 79.24±4.9    | 22.11                      | 4.12         | 38.14                         | 48.45           | 19.79                 | 25                                | 52.58             | 11.34   | 38.71  |
|                                            | <b>p</b>                          | 0.05         | 0.52                       | 0.10         | 0.0002 *                      | 0.002 *         | 0.24                  | <.0001 *                          | 0.33              | 0.27    | 0.16   |
| Daytime<br>Sleep<br>Duration<br>(hours)    | 0<br>(n = 680 <sup>a</sup> )      | 77.83±4.4    | 16.1                       | 2.65         | 30.74                         | 46.1            | 12.24                 | 17.59                             | 45.88             | 7.41    | 26.42  |
|                                            | <1<br>(n = 290 <sup>a</sup> )     | 78.04±4.4    | 15.63                      | 2.76         | 33.45                         | 40              | 14.88                 | 21.61                             | 54.14             | 10.42   | 30.94  |
|                                            | 1<br>(n = 336 <sup>a</sup> )      | 78.79±4.7    | 24.17                      | 5.07         | 40.77                         | 44.61           | 20                    | 27.01                             | 49.7              | 8.98    | 32.81  |
|                                            | >1<br>(n = 130 <sup>a</sup> )     | 80.05±5      | 33.33                      | 4.62         | 58.46                         | 51.54           | 24.62                 | 41.46                             | 61.54             | 14.62   | 39.17  |
|                                            | <b>p</b>                          | <.0001 *     | <.0001 *                   | 0.18         | <.0001 *                      | 0.15            | 0.0003 *              | <.0001 *                          | 0.004 *           | 0.05    | 0.02 * |

a, maximum n in group, varies slightly with missing co-variate data

CKD, chronic kidney disease



Table 2 - Night-time sleep duration vs metabolic risk factors, inflammatory and endothelial markers, lung function and cardiac markers.

|                                                             |   | Night Sleep (hours)            |                                   |                               | P        |
|-------------------------------------------------------------|---|--------------------------------|-----------------------------------|-------------------------------|----------|
|                                                             |   | < 6<br>(n = 213 <sup>d</sup> ) | 6-8.9<br>(n = 1126 <sup>d</sup> ) | ≥ 9<br>(n = 97 <sup>d</sup> ) |          |
| <b>Metabolic risk factors [mean (95% CI)]</b>               |   |                                |                                   |                               |          |
| SBP (mmHg)                                                  | A | 146.04 (143.52, 148.56)        | 147.31 (146.21, 148.4)            | 150.73 (146.99, 154.47)       | 0.12     |
| DBP (mmHg)                                                  | A | 76.59 (75.07, 78.11)           | 77.46 (76.8, 78.12)               | 77.25 (74.99, 79.5)           | 0.59     |
| HDL-C (mmol/L)                                              | A | 1.47 (1.41, 1.53)              | 1.48 (1.45, 1.5)                  | 1.37 (1.28, 1.46)             | 0.07     |
| Triglycerides (mmol/L)                                      | A | 1.3 (1.21, 1.39)               | 1.28 (1.25, 1.32)                 | 1.39 (1.26, 1.52)             | 0.31     |
| HbA1c <sup>c</sup> (%)                                      | A | 5.93 (5.85, 6.02)              | 5.75 (5.72, 5.79)                 | 5.88 (5.76, 6)                | 0.0001 * |
|                                                             | B | 5.9 (5.82, 5.98)               | 5.76 (5.73, 5.79)                 | 5.86 (5.74, 5.97)             | 0.003 *  |
| Glucose <sup>c</sup> (mmol/L)                               | A | 5.78 (5.62, 5.94)              | 5.55 (5.48, 5.61)                 | 5.72 (5.49, 5.95)             | 0.02 *   |
|                                                             | B | 5.74 (5.58, 5.9)               | 5.56 (5.49, 5.62)                 | 5.68 (5.45, 5.91)             | 0.08     |
| Insulin <sup>c</sup> (mU/L)                                 | A | 8.26 (7.54, 9.04)              | 7.92 (7.62, 8.24)                 | 7.82 (6.84, 8.94)             | 0.69     |
| <b>Inflammatory and endothelial markers [mean (95% CI)]</b> |   |                                |                                   |                               |          |
| CRP <sup>c</sup> (mg/L)                                     | A | 1.51 (1.28, 1.78)              | 1.34 (1.25, 1.44)                 | 1.46 (1.15, 1.87)             | 0.37     |
| IL-6 <sup>c</sup> (pg/mL)                                   | A | 3.03 (2.74, 3.35)              | 2.98 (2.86, 3.11)                 | 3.72 (3.21, 4.3)              | 0.02 *   |
|                                                             | B | 2.94 (2.67, 3.25)              | 3 (2.87, 3.13)                    | 3.61 (3.12, 4.18)             | 0.05     |
| vWF (IU/dL)                                                 | A | 140.97 (130.97, 150.97)        | 133.27 (128.91, 137.63)           | 119.04 (104.2, 133.89)        | 0.06     |
| <b>Lung function [mean (95% CI)]</b>                        |   |                                |                                   |                               |          |
| FEV1 (L)                                                    | A | 2.43 (2.35, 2.5)               | 2.46 (2.42, 2.49)                 | 2.44 (2.32, 2.55)             | 0.76     |
| <b>Cardiac markers [mean (95% CI)]</b>                      |   |                                |                                   |                               |          |
| NT-pro BNP <sup>c</sup> (pg/mL)                             | A | 121.67 (101.33, 146.1)         | 126.45 (116.87, 136.81)           | 134.61 (102.8, 176.25)        | 0.83     |
| cTnT <sup>c</sup> (pg/ml)                                   | A | 11.25 (10.29, 12.3)            | 10.82 (10.41, 11.24)              | 10.14 (8.89, 11.57)           | 0.44     |

A, adjusted for age

B, adjusted for age, BMI, social class and physical activity

c, geometric mean

d, maximum n in group, varies slightly with missing co-variate data

SBP, systolic blood pressure; DBP, diastolic blood pressure; HDL-C, high density lipoprotein cholesterol; HbA1c, glycated haemoglobin; CRP, C-reactive protein; IL-6, interleukin 6; vWF, von Willebrand factor; FEV1, forced expiratory volume in 1s; NT-pro BNP, N-terminal pro brain natriuretic peptide; cTnT, cardiac troponin T

Table 3 – Daytime sleep duration vs metabolic risk factors, inflammatory and endothelial markers, lung function and cardiac markers.

|                                                             |   | Daytime Sleep Duration (Hours) |                               |                              |                               | p value trend | p value >1h vs others |
|-------------------------------------------------------------|---|--------------------------------|-------------------------------|------------------------------|-------------------------------|---------------|-----------------------|
|                                                             |   | 0<br>(n = 680 <sup>d</sup> )   | <1<br>(n = 290 <sup>d</sup> ) | 1<br>(n = 336 <sup>d</sup> ) | >1<br>(n = 130 <sup>d</sup> ) |               |                       |
| <b>Metabolic risk factors [mean (95% CI)]</b>               |   |                                |                               |                              |                               |               |                       |
| SBP (mmHg)                                                  | A | 147.46 (146.05, 148.88)        | 148.76 (146.59, 150.92)       | 147.14 (145.13, 149.15)      | 144.13 (140.88, 147.39)       | 0.90          | 0.04 *                |
|                                                             | B | 147.49 (146.07, 148.9)         | 148.59 (146.42, 150.75)       | 146.97 (144.95, 148.99)      | 144.78 (141.44, 148.11)       | 0.96          | 0.12                  |
| DBP (mmHg)                                                  | A | 77.41 (76.56, 78.26)           | 78.08 (76.77, 79.38)          | 77.16 (75.95, 78.37)         | 75.54 (73.57, 77.5)           | 0.98          | 0.06                  |
|                                                             | B | 77.56 (76.7, 78.41)            | 78.04 (76.74, 79.35)          | 76.94 (75.73, 78.16)         | 75.64 (73.63, 77.65)          | 0.74          | 0.09                  |
| HDL-C (mmol/L)                                              | A | 1.5 (1.47, 1.54)               | 1.47 (1.42, 1.52)             | 1.44 (1.39, 1.49)            | 1.33 (1.25, 1.41)             | 0.01 *        | 0.0002 *              |
|                                                             | B | 1.49 (1.46, 1.52)              | 1.46 (1.41, 1.5)              | 1.46 (1.42, 1.51)            | 1.41 (1.33, 1.48)             | 0.14          | 0.10                  |
| Triglycerides (mmol/L)                                      | A | 1.24 (1.19, 1.29)              | 1.3 (1.23, 1.38)              | 1.35 (1.28, 1.42)            | 1.42 (1.31, 1.54)             | 0.01 *        | 0.02 *                |
|                                                             | B | 1.26 (1.21, 1.3)               | 1.33 (1.26, 1.4)              | 1.33 (1.26, 1.4)             | 1.34 (1.22, 1.45)             | 0.03 *        | 0.47                  |
| HbA1c <sup>c</sup> (%)                                      | A | 5.73 (5.69, 5.78)              | 5.74 (5.68, 5.81)             | 5.87 (5.8, 5.93)             | 5.99 (5.88, 6.1)              | 0.01 *        | 0.0003 *              |
|                                                             | B | 5.75 (5.7, 5.79)               | 5.77 (5.7, 5.83)              | 5.84 (5.78, 5.91)            | 5.9 (5.79, 6.01)              | 0.04 *        | 0.04 *                |
| Glucose <sup>c</sup> (mmol/L)                               | A | 5.52 (5.43, 5.6)               | 5.48 (5.36, 5.61)             | 5.7 (5.58, 5.83)             | 5.98 (5.77, 6.2)              | 0.09          | 0.0002 *              |
|                                                             | B | 5.54 (5.45, 5.62)              | 5.51 (5.38, 5.63)             | 5.68 (5.56, 5.8)             | 5.86 (5.65, 6.07)             | 0.25          | 0.01 *                |
| Insulin <sup>c</sup> (mU/L)                                 | A | 7.5 (7.13, 7.88)               | 7.43 (6.89, 8.02)             | 8.69 (8.09, 9.33)            | 10.36 (9.21, 11.65)           | 0.01 *        | <.0001 *              |
|                                                             | B | 7.7 (7.36, 8.07)               | 7.68 (7.16, 8.24)             | 8.31 (7.77, 8.88)            | 9.29 (8.32, 10.37)            | 0.15          | 0.005 *               |
| <b>Inflammatory and endothelial markers [mean (95% CI)]</b> |   |                                |                               |                              |                               |               |                       |
| CRP <sup>c</sup> (mg/L)                                     | A | 1.24 (1.13, 1.36)              | 1.36 (1.19, 1.57)             | 1.56 (1.37, 1.78)            | 1.67 (1.35, 2.08)             | 0.01 *        | 0.07                  |
|                                                             | B | 1.27 (1.16, 1.39)              | 1.4 (1.22, 1.61)              | 1.5 (1.32, 1.71)             | 1.51 (1.21, 1.89)             | 0.04 *        | 0.37                  |
| IL-6 <sup>c</sup> (pg/mL)                                   | A | 2.88 (2.73, 3.05)              | 3.01 (2.76, 3.28)             | 3.19 (2.95, 3.45)            | 3.58 (3.14, 4.09)             | 0.03 *        | 0.01 *                |
|                                                             | B | 2.92 (2.76, 3.08)              | 3.06 (2.81, 3.33)             | 3.13 (2.89, 3.39)            | 3.34 (2.92, 3.81)             | 0.10          | 0.15                  |
| vWF (IU/dL)                                                 | A | 132.65 (127.06, 138.24)        | 127.34 (118.81, 135.87)       | 134.92 (126.85, 142.98)      | 148.03 (135.05, 161.01)       | 1.00          | 0.02 *                |
|                                                             | B | 132.76 (127.1, 138.41)         | 127.64 (119.03, 136.24)       | 134.88 (126.7, 143.07)       | 147.74 (134.39, 161.1)        | 0.96          | 0.03 *                |
| <b>Lung function [mean (95% CI)]</b>                        |   |                                |                               |                              |                               |               |                       |
| FEV1 (L)                                                    | A | 2.52 (2.48, 2.57)              | 2.46 (2.39, 2.52)             | 2.37 (2.31, 2.44)            | 2.21 (2.11, 2.31)             | <.0001 *      | <.0001 *              |
|                                                             | B | 2.52 (2.48, 2.56)              | 2.44 (2.38, 2.51)             | 2.38 (2.32, 2.44)            | 2.26 (2.15, 2.36)             | <.0001 *      | <.0001 *              |
| <b>Cardiac markers [mean (95% CI)]</b>                      |   |                                |                               |                              |                               |               |                       |
| NT-pro BNP <sup>c</sup> (pg/mL)                             | A | 122.31 (110.53, 135.34)        | 110.95 (95.15, 129.37)        | 135.15 (117.08, 156.02)      | 171.15 (134.5, 217.78)        | 0.70          | 0.01 *                |
|                                                             | B | 123.28 (111.4, 136.43)         | 111.2 (95.39, 129.62)         | 135.76 (117.52, 156.82)      | 167.33 (130.92, 213.88)       | 0.82          | 0.02 *                |
| cTnT <sup>c</sup> (pg/ml)                                   | A | 10.33 (9.83, 10.85)            | 10.45 (9.7, 11.27)            | 11.59 (10.8, 12.43)          | 12.79 (11.37, 14.38)          | 0.03 *        | 0.004 *               |
|                                                             | B | 10.41 (9.91, 10.93)            | 10.52 (9.77, 11.33)           | 11.31 (10.55, 12.13)         | 12.3 (10.93, 13.86)           | 0.12          | 0.03 *                |

1  
2  
3  
4  
5 A, adjusted for age

6 B, adjusted for age, BMI, social class and physical activity

7  
8 c, geometric mean

9  
10 d, maximum n in group, varies slightly with missing co-variate data

11 SBP, systolic blood pressure; DBP, diastolic blood pressure; HDL-C, high density lipoprotein cholesterol; HbA1c, glycated haemoglobin; CRP, C-reactive  
12 protein; IL-6, interleukin 6; vWF, von Willebrand factor; FEV1, forced expiratory volume in 1s; NT-pro BNP, N-terminal pro brain natriuretic peptide; cTnT,  
13 cardiac troponin T  
14  
15  
16  
17  
18  
19  
20  
21  
22  
23  
24  
25  
26  
27  
28  
29  
30  
31  
32  
33  
34  
35  
36  
37  
38  
39  
40  
41  
42  
43  
44  
45  
46  
47  
48  
49

Table 4 – Sleeping patterns vs non-invasive vascular measurements.

|                                            |                                | CIMT (mm)         |                             | PWV (m/s)            |                             | Distensibility ( $10^{-3}\text{kPa}^{-1}$ ) |                             |
|--------------------------------------------|--------------------------------|-------------------|-----------------------------|----------------------|-----------------------------|---------------------------------------------|-----------------------------|
|                                            |                                | Age-adjusted      | Additional Adj <sup>a</sup> | Age-adjusted         | Additional Adj <sup>a</sup> | Age-adjusted                                | Additional Adj <sup>a</sup> |
|                                            |                                | mean (95% CI)     | mean (95% CI)               | mean (95% CI)        | mean (95% CI)               | mean (95% CI)                               | mean (95% CI)               |
| Night-time<br>Sleep<br>Duration<br>(hours) | < 6 (n = 209 <sup>b</sup> )    | 0.81 (0.78, 0.83) | 0.8 (0.78, 0.82)            | 10.48 (10.24, 10.71) | 10.45 (10.22, 10.69)        | 11.66 (11.11, 12.21)                        | 11.62 (11.06, 12.18)        |
|                                            | 6-8.9 (n = 1125 <sup>b</sup> ) | 0.81 (0.8, 0.82)  | 0.81 (0.8, 0.82)            | 10.18 (10.08, 10.27) | 10.18 (10.08, 10.28)        | 12.29 (12.06, 12.53)                        | 12.31 (12.08, 12.55)        |
|                                            | ≥ 9 (n = 95 <sup>b</sup> )     | 0.82 (0.79, 0.85) | 0.82 (0.79, 0.85)           | 10.25 (9.91, 10.6)   | 10.25 (9.9, 10.59)          | 11.71 (10.9, 12.51)                         | 11.81 (11, 12.63)           |
|                                            | <b>p</b>                       | 0.67              | 0.64                        | 0.07                 | 0.11                        | 0.06                                        | 0.06                        |
| Daytime<br>Sleep<br>Duration<br>(hours)    | 0 (n = 677 <sup>b</sup> )      | 0.81 (0.79, 0.82) | 0.81 (0.8, 0.82)            | 10.25 (10.12, 10.38) | 10.25 (10.12, 10.38)        | 12.23 (11.93, 12.53)                        | 12.2 (11.89, 12.5)          |
|                                            | <1 (n = 290 <sup>b</sup> )     | 0.81 (0.79, 0.82) | 0.81 (0.79, 0.82)           | 10.15 (9.96, 10.35)  | 10.16 (9.96, 10.36)         | 12.49 (12.03, 12.96)                        | 12.5 (12.04, 12.97)         |
|                                            | 1 (n = 334 <sup>b</sup> )      | 0.8 (0.79, 0.82)  | 0.8 (0.78, 0.82)            | 10.2 (10.01, 10.38)  | 10.2 (10.01, 10.38)         | 11.81 (11.38, 12.25)                        | 11.88 (11.44, 12.32)        |
|                                            | >1 (n = 128 <sup>b</sup> )     | 0.84 (0.81, 0.87) | 0.83 (0.8, 0.86)            | 10.29 (9.99, 10.6)   | 10.29 (9.98, 10.6)          | 11.96 (11.25, 12.67)                        | 12.12 (11.39, 12.85)        |
| <b>p</b>                                   | 0.17                           | 0.37              | 0.80                        | 0.85                 | 0.18                        | 0.30                                        |                             |

a, adjusted for age, BMI, social class and physical activity

b, maximum n in group

CIMT, carotid intima-media thickness; PWV, pulse wave velocity

## Bibliography

1. Flamer HE. Sleep disorders in the elderly. *Australian and New Zealand Journal of Medicine*. 1996;26(1):96-104.
2. Grandner MA, Sands-Lincoln MR, Pak VM, Garland SN. Sleep duration, cardiovascular disease, and proinflammatory biomarkers. *Nature and science of sleep*. 2013;5:93-107.
3. Jackson CL, Redline S, Emmons KM. Sleep as a potential fundamental contributor to disparities in cardiovascular health. *Annual review of public health*. 2015;36:417-40.
4. Knutson KL. Sleep duration and cardiometabolic risk: a review of the epidemiologic evidence. *Best practice & research Clinical endocrinology & metabolism*. 2010;24(5):731-43.
5. Blachier M, Dauvilliers Y, Jaussent I, Helmer C, Ritchie K, Jouven X, et al. Excessive daytime sleepiness and vascular events: the Three City Study. *Annals of neurology*. 2012;71(5):661-7.
6. Newman AB, Spiekerman CF, Enright P, Lefkowitz D, Manolio T, Reynolds CF, et al. Daytime sleepiness predicts mortality and cardiovascular disease in older adults. The Cardiovascular Health Study Research Group. *Journal of the American Geriatrics Society*. 2000;48(2):115-23.
7. Wannamethee SG, Papacosta O, Lennon L, Whincup PH. Self-Reported Sleep Duration, Napping, and Incident Heart Failure: Prospective Associations in the British Regional Heart Study. *Journal of the American Geriatrics Society*. 2016.
8. Leng Y, Wainwright NW, Cappuccio FP, Surtees PG, Hayat S, Luben R, et al. Daytime napping and the risk of all-cause and cause-specific mortality: a 13-year follow-up of a British population. *American journal of epidemiology*. 2014;179(9):1115-24.
9. Tanabe N, Iso H, Seki N, Suzuki H, Yatsuya H, Toyoshima H, et al. Daytime napping and mortality, with a special reference to cardiovascular disease: the JACC study. *International journal of epidemiology*. 2010;39(1):233-43.
10. Zhong G, Wang Y, Tao T, Ying J, Zhao Y. Daytime napping and mortality from all causes, cardiovascular disease, and cancer: a meta-analysis of prospective cohort studies. *Sleep medicine*. 2015;16(7):811-9.
11. Hayley AC, Williams LJ, Kennedy GA, Berk M, Brennan SL, Pasco JA. Excessive daytime sleepiness and metabolic syndrome: a cross-sectional study. *Metabolism*. 2015;64(2):244-52.
12. Fang W, Li Z, Wu L, Cao Z, Liang Y, Yang H, et al. Longer habitual afternoon napping is associated with a higher risk for impaired fasting plasma glucose and diabetes mellitus in older adults: results from the Dongfeng–Tongji cohort of retired workers. *Sleep medicine*. 2013;14(10):950-4.
13. Tsai TC, Wu JS, Yang YC, Huang YH, Lu FH, Chang CJ. Long sleep duration associated with a higher risk of increased arterial stiffness in males. *Sleep*. 2014;37(8):1315-20.
14. Abe T, Aoki T, Yata S, Okada M. Sleep duration is significantly associated with carotid artery atherosclerosis incidence in a Japanese population. *Atherosclerosis*. 2011;217(2):509-13.
15. Yoshioka E, Saijo Y, Kita T, Okada E, Satoh H, Kawaharada M, et al. Relation between self-reported sleep duration and arterial stiffness: a cross-sectional study of middle-aged Japanese civil servants. *Sleep*. 2011;34(12):1681-6.
16. Wolff B, Volzke H, Schwahn C, Robinson D, Kessler C, John U. Relation of self-reported sleep duration with carotid intima-media thickness in a general population sample. *Atherosclerosis*. 2008;196(2):727-32.
17. Nakazaki C, Noda A, Koike Y, Yamada S, Murohara T, Ozaki N. Association of insomnia and short sleep duration with atherosclerosis risk in the elderly. *American journal of hypertension*. 2012;25(11):1149-55.
18. Lennon LT, Ramsay SE, Papacosta O, Shaper AG, Wannamethee SG, Whincup PH. Cohort Profile Update: The British Regional Heart Study 1978-2014: 35 years follow-up of cardiovascular disease and ageing. *International journal of epidemiology*. 2015;44(3):826-g.
19. Ramsay SE, Arianayagam DS, Whincup PH, Lennon LT, Cryer J, Papacosta AO, et al. Cardiovascular risk profile and frailty in a population-based study of older British men. *Heart*. 2015;101(8):616-22.

- 1
- 2
- 3 20. Wannamethee SG, Lowe GD, Whincup PH, Rumley A, Walker M, Lennon L. Physical activity
- 4 and hemostatic and inflammatory variables in elderly men. *Circulation*. 2002;105(15):1785-90.
- 5 21. Wannamethee SG, Whincup PH, Shaper AG, Rumley A, Lennon L, Lowe GDO. Circulating
- 6 inflammatory and hemostatic biomarkers are associated with risk of myocardial infarction and
- 7 coronary death, but not angina pectoris, in older men. *Journal of Thrombosis and Haemostasis*.
- 8 2009;7(10):1605-11.
- 9 22. Wannamethee GS, Welsh P, Whincup PH, Lennon L, Papacosta O, Sattar N. N-terminal pro
- 10 brain natriuretic peptide but not copeptin improves prediction of heart failure over other routine
- 11 clinical risk parameters in older men with and without cardiovascular disease: population-based
- 12 study. *European Journal of Heart Failure*. 2014;16(1):25-32.
- 13 23. National Institute for Clinical Excellence. Chronic heart failure: the management of adults
- 14 with chronic heart failure in primary and secondary care (partial update). (Clinical guideline 108)
- 15 2010 [Available from: <http://www.nice.org.uk/CG108>].
- 16 24. Levey AS, Stevens LA, Schmid CH, et al. A new equation to estimate glomerular filtration
- 17 rate. *Annals of Internal Medicine*. 2009;150(9):604-12.
- 18 25. Dijk JM, Algra A, van der Graaf Y, Grobbee DE, Bots ML. Carotid stiffness and the risk of new
- 19 vascular events in patients with manifest cardiovascular disease. *The SMART study*. *European heart*
- 20 *journal*. 2005;26(12):1213-20.
- 21 26. Leng Y, Ahmadi-Abhari S, Wainwright NWJ, Cappuccio FP, Surtees PG, Luben R, et al.
- 22 Daytime napping, sleep duration and serum C reactive protein: a population-based cohort study.
- 23 *BMJ Open*. 2014;4(11):e006071.
- 24 27. Kociol RD, Pang PS, Gheorghide M, Fonarow GC, O'Connor CM, Felker GM. Troponin
- 25 Elevation in Heart Failure Prevalence, Mechanisms, and Clinical Implications. *Journal of the American*
- 26 *College of Cardiology*. 2010;56(14):1071-8.
- 27 28. Kragelund C, Grønning B, Køber L, Hildebrandt P, Steffensen R. N-Terminal Pro-B-Type
- 28 Natriuretic Peptide and Long-Term Mortality in Stable Coronary Heart Disease. *New England Journal*
- 29 *of Medicine*. 2005;352(7):666-75.
- 30 29. Sato Y, Fujiwara H, Takatsu Y. Biochemical markers in heart failure. *Journal of cardiology*.
- 31 2012;59(1):1-7.
- 32 30. Laugsand LE, Strand LB, Platou C, Vatten LJ, Janszky I. Insomnia and the risk of incident heart
- 33 failure: a population study. *European heart journal*. 2014;35(21):1382-93.
- 34 31. Ingelsson E, Lind L, Ärnlöv J, Sundström J. Sleep disturbances independently predict heart
- 35 failure in overweight middle-aged men. *European Journal of Heart Failure*. 2007;9(2):184-90.
- 36
- 37
- 38
- 39
- 40
- 41
- 42
- 43
- 44
- 45
- 46
- 47
- 48
- 49
- 50
- 51
- 52
- 53
- 54
- 55
- 56
- 57
- 58
- 59
- 60

## STROBE Statement—checklist of items that should be included in reports of observational studies

|                              | Item No | Recommendation                                                                                                                                                                                                                                                                                                                                                                                                                                                                                                                                                                                                                                                                                                                |
|------------------------------|---------|-------------------------------------------------------------------------------------------------------------------------------------------------------------------------------------------------------------------------------------------------------------------------------------------------------------------------------------------------------------------------------------------------------------------------------------------------------------------------------------------------------------------------------------------------------------------------------------------------------------------------------------------------------------------------------------------------------------------------------|
| <b>Title and abstract</b>    | 1       | (a) Indicate the study's design with a commonly used term in the title or the abstract – <b>PAGE 1</b><br>(b) Provide in the abstract an informative and balanced summary of what was done and what was found – <b>PAGE 2</b>                                                                                                                                                                                                                                                                                                                                                                                                                                                                                                 |
| <b>Introduction</b>          |         |                                                                                                                                                                                                                                                                                                                                                                                                                                                                                                                                                                                                                                                                                                                               |
| Background/rationale         | 2       | Explain the scientific background and rationale for the investigation being reported – <b>PAGE 4</b>                                                                                                                                                                                                                                                                                                                                                                                                                                                                                                                                                                                                                          |
| Objectives                   | 3       | State specific objectives, including any prespecified hypotheses - <b>PAGE 4</b>                                                                                                                                                                                                                                                                                                                                                                                                                                                                                                                                                                                                                                              |
| <b>Methods</b>               |         |                                                                                                                                                                                                                                                                                                                                                                                                                                                                                                                                                                                                                                                                                                                               |
| Study design                 | 4       | Present key elements of study design early in the paper - <b>PAGE 5-7</b>                                                                                                                                                                                                                                                                                                                                                                                                                                                                                                                                                                                                                                                     |
| Setting                      | 5       | Describe the setting, locations, and relevant dates, including periods of recruitment, exposure, follow-up, and data collection - <b>PAGE 5-7</b>                                                                                                                                                                                                                                                                                                                                                                                                                                                                                                                                                                             |
| Participants                 | 6       | (a) <i>Cohort study</i> —Give the eligibility criteria, and the sources and methods of selection of participants. Describe methods of follow-up – <b>PAGE 5</b><br><i>Case-control study</i> —Give the eligibility criteria, and the sources and methods of case ascertainment and control selection. Give the rationale for the choice of cases and controls<br><i>Cross-sectional study</i> —Give the eligibility criteria, and the sources and methods of selection of participants<br>(b) <i>Cohort study</i> —For matched studies, give matching criteria and number of exposed and unexposed – <b>N/A</b><br><i>Case-control study</i> —For matched studies, give matching criteria and the number of controls per case |
| Variables                    | 7       | Clearly define all outcomes, exposures, predictors, potential confounders, and effect modifiers. Give diagnostic criteria, if applicable – <b>PAGE 5-7</b>                                                                                                                                                                                                                                                                                                                                                                                                                                                                                                                                                                    |
| Data sources/<br>measurement | 8*      | For each variable of interest, give sources of data and details of methods of assessment (measurement). Describe comparability of assessment methods if there is more than one group – <b>PAGE 5-7</b>                                                                                                                                                                                                                                                                                                                                                                                                                                                                                                                        |
| Bias                         | 9       | Describe any efforts to address potential sources of bias – <b>PAGE 13</b>                                                                                                                                                                                                                                                                                                                                                                                                                                                                                                                                                                                                                                                    |
| Study size                   | 10      | Explain how the study size was arrived at - <b>PAGE 5</b>                                                                                                                                                                                                                                                                                                                                                                                                                                                                                                                                                                                                                                                                     |
| Quantitative variables       | 11      | Explain how quantitative variables were handled in the analyses. If applicable, describe which groupings were chosen and why – <b>PAGE 5-7</b>                                                                                                                                                                                                                                                                                                                                                                                                                                                                                                                                                                                |
| Statistical methods          | 12      | (a) Describe all statistical methods, including those used to control for confounding - <b>PAGE 7</b><br>(b) Describe any methods used to examine subgroups and interactions – <b>PAGE 7</b><br>(c) Explain how missing data were addressed – <b>PAGE 5-6</b><br>(d) <i>Cohort study</i> —If applicable, explain how loss to follow-up was addressed – <b>N/A</b><br><i>Case-control study</i> —If applicable, explain how matching of cases and controls was addressed<br><i>Cross-sectional study</i> —If applicable, describe analytical methods taking account of sampling strategy<br>(e) Describe any sensitivity analyses – <b>N/A</b>                                                                                 |

Continued on next page

**Results**

|                  |     |                                                                                                                                                                                                                                                                                                                                                                                                                                                             |
|------------------|-----|-------------------------------------------------------------------------------------------------------------------------------------------------------------------------------------------------------------------------------------------------------------------------------------------------------------------------------------------------------------------------------------------------------------------------------------------------------------|
| Participants     | 13* | (a) Report numbers of individuals at each stage of study—eg numbers potentially eligible, examined for eligibility, confirmed eligible, included in the study, completing follow-up, and analysed – <b>PAGE 5-6</b><br>(b) Give reasons for non-participation at each stage – <b>PAGE 5</b><br>(c) Consider use of a flow diagram – <b>N/A</b>                                                                                                              |
| Descriptive data | 14* | (a) Give characteristics of study participants (eg demographic, clinical, social) and information on exposures and potential confounders – <b>PAGE 7-8, 15</b><br>(b) Indicate number of participants with missing data for each variable of interest – <b>PAGE 15-19</b><br>(c) <i>Cohort study</i> —Summarise follow-up time (eg, average and total amount) – <b>PAGE 5</b>                                                                               |
| Outcome data     | 15* | <i>Cohort study</i> —Report numbers of outcome events or summary measures over time – <b>PAGE 15-19</b><br><i>Case-control study</i> —Report numbers in each exposure category, or summary measures of exposure<br><i>Cross-sectional study</i> —Report numbers of outcome events or summary measures                                                                                                                                                       |
| Main results     | 16  | (a) Give unadjusted estimates and, if applicable, confounder-adjusted estimates and their precision (eg, 95% confidence interval). Make clear which confounders were adjusted for and why they were included – <b>PAGE 15-19</b><br>(b) Report category boundaries when continuous variables were categorized – <b>N/A</b><br>(c) If relevant, consider translating estimates of relative risk into absolute risk for a meaningful time period – <b>N/A</b> |
| Other analyses   | 17  | Report other analyses done—eg analyses of subgroups and interactions, and sensitivity analyses – <b>PAGE 9-10</b>                                                                                                                                                                                                                                                                                                                                           |

**Discussion**

|                  |    |                                                                                                                                                                                                |
|------------------|----|------------------------------------------------------------------------------------------------------------------------------------------------------------------------------------------------|
| Key results      | 18 | Summarise key results with reference to study objectives – <b>PAGE 7-10</b>                                                                                                                    |
| Limitations      | 19 | Discuss limitations of the study, taking into account sources of potential bias or imprecision. Discuss both direction and magnitude of any potential bias – <b>PAGE 13</b>                    |
| Interpretation   | 20 | Give a cautious overall interpretation of results considering objectives, limitations, multiplicity of analyses, results from similar studies, and other relevant evidence – <b>PAGE 11-13</b> |
| Generalisability | 21 | Discuss the generalisability (external validity) of the study results – <b>PAGE 13</b>                                                                                                         |

**Other information**

|         |    |                                                                                                                                                                                |
|---------|----|--------------------------------------------------------------------------------------------------------------------------------------------------------------------------------|
| Funding | 22 | Give the source of funding and the role of the funders for the present study and, if applicable, for the original study on which the present article is based – <b>PAGE 14</b> |
|---------|----|--------------------------------------------------------------------------------------------------------------------------------------------------------------------------------|

\*Give information separately for cases and controls in case-control studies and, if applicable, for exposed and unexposed groups in cohort and cross-sectional studies.

**Note:** An Explanation and Elaboration article discusses each checklist item and gives methodological background and published examples of transparent reporting. The STROBE checklist is best used in conjunction with this article (freely available on the Web sites of PLoS Medicine at <http://www.plosmedicine.org/>, Annals of Internal Medicine at <http://www.annals.org/>, and Epidemiology at <http://www.epidem.com/>). Information on the STROBE Initiative is available at [www.strobe-statement.org](http://www.strobe-statement.org).
